# Supplementary material for: Pd/Cu cooperative catalysis: an efficient synthesis of (3-isoindazolyl)allenes via cross-coupling of 2-alkynyl azobenzenes and terminal alkynes
Source: Royal Society of Chemistry journal article supplement (doi:10.1039/c7cc00562h), 2017-01-01

## Supporting Information

# Pd/Cu Cooperative Catalysis: An Efficient Synthesis of (3-Isoindazolyl)allenes via Cross-coupling of 2-Alkynyl Azobenzenes and Terminal Alkynes

Chuan Zhu,<sup>a</sup> Chao Feng,<sup>\*a</sup> Motoki Yamane<sup>\*b</sup>

<sup>a</sup>Institute of Advanced Synthesis, School of Chemistry and Molecular Engineering, Jiangsu National Synergetic Innovation Center for Advanced Material, Nanjing Tech University, 30 South Puzhu Road, Nanjing 211800, P. R. China. Email: iamcfeng@njtech.edu.cn

<sup>b</sup>Division of Chemistry and Biological Chemistry, School of Physical and Mathematical Sciences, Nanyang Technological University, 21 Nanyang Link, Singapore 637371, Singapore. Email: yamane@ntu.edu.sg

### Table of Contents

|     |                                                |
|-----|------------------------------------------------|
| S2  | General Methods                                |
| S2  | Synthesis of Starting Materials                |
| S5  | Synthesis of (3-Isoindazolyl)allenes           |
| S13 | Thermal Cyclization of Coumpound <b>4a</b>     |
| S14 | Reference                                      |
| S15 | <sup>1</sup> H and <sup>13</sup> C NMR spectra |

## General Methods

NMR spectra were recorded in CDCl<sub>3</sub> with TMS for <sup>1</sup>H (400 MHz) and <sup>13</sup>C (100 MHz). Melting points were uncorrected and were recorded on a digital melting point apparatus. High resolution mass spectra were performed on an electrospray ionization mass spectrometer. Flash column chromatography was performed using silica gel of 230-400 mesh with distilled solvents. Commercially available reagents and solvents were used without further purification.

## Synthesis of Starting Materials

### Preparation of 2-iodoazobenzenes **1a-e**

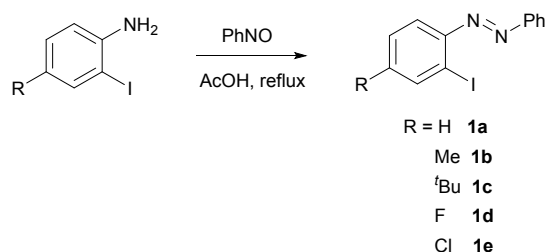

Compounds **1a-e** were prepared by the literature method.<sup>1</sup>

### Preparation of 2-iodoazobenzenes **1f** and **1g**

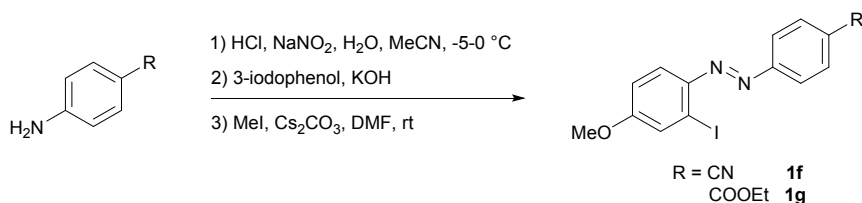

Compound **1f** was prepared by the literature method.<sup>1</sup>

Following the literature procedure,<sup>1</sup> compound **1g** was prepared. To a solution of ethyl 4-aminobenzoate (10 mmol, 1.0 equiv) in 4 mL of MeCN/H<sub>2</sub>O (1/3) was added concentrated HCl (20 mmol, 2.0 equiv). The reaction mixture was then cooled to -5-0 °C. To the cooled solution a solution of NaNO<sub>2</sub> (12 mmol, 1.2 equiv) in MeCN/H<sub>2</sub>O (1/1) was added at -5-0 °C. Then the reaction mixture was allowed to stir at -5-0 °C for 30 min. This diazonium salt solution was added to a solution of 3-iodophenol (11 mmol, 1.1 equiv) and KOH (20 mmol, 2.0 equiv) in 20 mL of MeCN/H<sub>2</sub>O (9:1) at -5-0 °C. Then the reaction mixture was warm to room temperature over 3 h and stirred at room temperature for an additional 3 h. The reaction mixture was then diluted with EtOAc and the aqueous layer acidified. The organic layer was washed with 10 mL×2 10% HCl solution, 10 mL×2 brine and 10 mL H<sub>2</sub>O. The organic layer was dried over MgSO<sub>4</sub> and concentrated in vacuo to give a red solid. The red solid was dissolved in 100 mL DMF and Cs<sub>2</sub>CO<sub>3</sub> (21 mmol, 2.1 equiv) and MeI (12 mmol, 1.2 equiv) were added. The mixture was allowed to stir at 30 °C for 24 h and then diluted with 10% HCl solution, and extracted with 20 mL×3 EtOAc. The combined organics were washed with 20 mL H<sub>2</sub>O, 20 mL×2 0.5 M NaOH solution and 20 mL H<sub>2</sub>O. The organic layer was dried over MgSO<sub>4</sub>, filtered and concentrated in vacuo. The solids were then recrystallized from an EtOH/H<sub>2</sub>O mixture, to yield 2.65 g of dark red solid in 65% yield; mp 183-185 °C; <sup>1</sup>H NMR (400 MHz, CDCl<sub>3</sub>) δ = 1.43 (t, 3H, *J* = 7.1 Hz), 3.89

(s, 3H), 4.42 (q, 2H,  $J = 7.1$  Hz), 6.98 (dd, 1H,  $J = 2.4, 8.8$  Hz), 7.56 (d, 1H,  $J = 2.4$  Hz), 7.73 (d, 1H,  $J = 8.8$  Hz), 7.98 (d, 2H,  $J = 8.8$  Hz), 8.19 (d, 2H,  $J = 8.8$  Hz);  $^{13}\text{C}$  NMR (100MHz,  $\text{CDCl}_3$ )  $\delta = 14.3, 55.9, 61.2, 106.2, 115.5, 118.0, 123.0, 124.0, 130.6, 132.0, 145.3, 154.8, 162.7, 166.0$ ; ESI-HRMS: Found:  $m/z$  411.0204. Calcd for  $\text{C}_{16}\text{H}_{15}\text{IN}_2\text{O}_3$ :  $(\text{M}+\text{H})^+$  411.0206.

General procedure for preparation of 2-alkynyl azobenzenes **3a-h**.

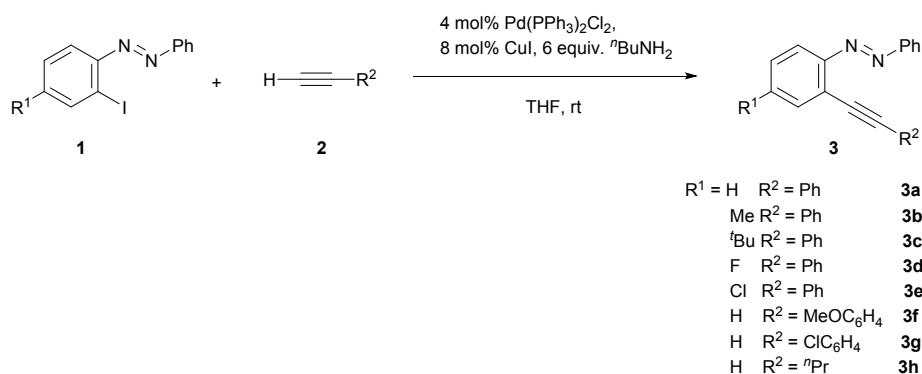

The 2-iodoazobenzene **1** (1.0 mmol, 1.0 equiv),  $\text{Pd}(\text{PPh}_3)_2\text{Cl}_2$  (28.1 mg, 0.04 mmol, 0.04 equiv),  $\text{CuI}$  (15.2 mg, 0.08 mmol, 0.08 equiv) and  $t\text{BuNH}_2$  (497  $\mu\text{L}$ , 6.0 mmol, 6.0 equiv) were dissolved in 10 mL anhydrous THF under  $\text{N}_2$ . The mixture was immediately purged by  $\text{N}_2$  three times. To resulting solution terminal alkyne **2** (1.2 mmol, 1.2 equiv) was added dropwise. The mixture was stirred at room temperature. After the reaction was completed according to TLC reaction control (2-7 h),  $\text{NH}_4\text{Cl}$  saturated aqueous solution (15 mL) was added. The organic layer was separated, and the aqueous layer was extracted twice with ethyl acetate (5 mL). The combined organic layers were dried over  $\text{MgSO}_4$  and concentrated in vacuo. The crude residue was purified by column chromatography on silica gel (hexane/ethyl acetate 100:1 to 50:1) to afford compounds **3a-h**.

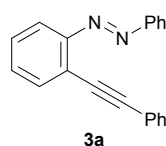

*1-phenyl-2-(2-(phenylethynyl)phenyl)diazene (3a)*. Yield 80% (226 mg); red solid; mp 53-55  $^\circ\text{C}$ ;  $^1\text{H}$  NMR (400 MHz,  $\text{CDCl}_3$ )  $\delta = 7.34\text{-}7.39$  (m, 3H), 7.41-7.47 (m, 2H), 7.48-7.56 (m, 3H), 7.58-7.62 (m, 2H), 7.69-7.77 (m, 2H), 8.02 (d, 2H,  $J = 7.2$  Hz);  $^{13}\text{C}$  NMR (100MHz,  $\text{CDCl}_3$ )  $\delta = 86.8, 95.6, 116.2, 123.3, 123.4, 123.7, 128.36, 128.43, 128.9, 129.1, 130.5, 131.3, 131.6, 133.3, 152.8, 153.0$ ; ESI-HRMS: Found:  $m/z$  283.1240. Calcd for  $\text{C}_{20}\text{H}_{14}\text{N}_2$ :  $(\text{M}+\text{H})^+$  283.1235.

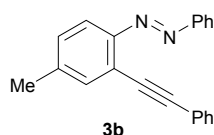

*1-(4-methyl-2-(phenylethynyl)phenyl)-2-phenyldiazene (3b)*. Yield 78% (231 mg); red solid; mp 83-85  $^\circ\text{C}$ ;  $^1\text{H}$  NMR (400 MHz,  $\text{CDCl}_3$ )  $\delta = 2.43$  (s, 3H), 7.23 (dd, 1H,  $J = 1.2, 8.4$  Hz), 7.35-7.39 (m, 3H), 7.45-7.55 (m, 4H), 7.56-7.62 (m, 2H), 7.69 (d, 1H,  $J = 8.4$  Hz), 8.01 (d, 2H,  $J = 7.2$  Hz);  $^{13}\text{C}$  NMR (100MHz,  $\text{CDCl}_3$ )  $\delta = 21.2, 87.0, 95.2, 115.9, 123.1, 123.5, 123.8, 128.3, 128.4, 129.1$ .

129.9, 131.0, 131.6, 133.6, 141.1, 151.1, 152.9; ESI-HRMS: Found:  $m/z$  297.1399. Calcd for  $C_{21}H_{16}N_2$ :  $(M+H)^+$  297.1392.

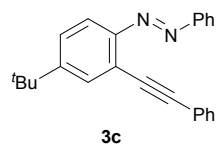

*1-(4-(tert-butyl)-2-(phenylethynyl)phenyl)-2-phenyldiazene (3c)*. Yield 75% (254 mg); red solid; mp 83-85 °C;  $^1H$  NMR (400 MHz,  $CDCl_3$ )  $\delta$  = 1.38 (s, 9H), 7.32-7.39 (m, 3H), 7.42-7.54 (m, 4H), 7.58-7.63 (m, 2H), 7.68-7.73 (m, 2H), 8.01 (d, 2H,  $J$  = 7.2 Hz);  $^{13}C$  NMR (100MHz,  $CDCl_3$ )  $\delta$  = 31.1, 35.0, 87.4, 94.9, 115.8, 122.8, 123.2, 123.4, 123.5, 126.4, 128.3, 129.0, 130.1, 131.0, 131.6, 151.0, 152.9, 154.1; ESI-HRMS: Found:  $m/z$  339.1868. Calcd for  $C_{24}H_{22}N_2$ :  $(M+H)^+$  339.1861.

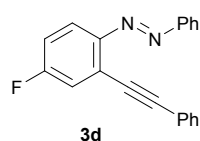

*1-(4-fluoro-2-(phenylethynyl)phenyl)-2-phenyldiazene (3d)*. Yield 65% (195 mg); red solid; mp 79-81 °C;  $^1H$  NMR (400 MHz,  $CDCl_3$ )  $\delta$  = 7.09-7.16 (m, 1H), 7.36-7.43 (m, 4H), 7.47-7.56 (m, 3H), 7.57-7.61 (m, 2H), 7.80 (dd, 1H,  $J$  = 3.4, 9.0 Hz), 7.99-8.02 (m, 2H);  $^{13}C$  NMR (100MHz,  $CDCl_3$ )  $\delta$  = 85.7 (d,  $J$  = 3.1 Hz), 96.7, 116.4 (d,  $J$  = 23.0 Hz), 118.1 (d,  $J$  = 8.9 Hz), 119.4 (d,  $J$  = 23.7 Hz), 123.0, 123.2, 128.4, 128.8, 129.2 (d,  $J$  = 10.0 Hz), 131.3, 131.7, 149.6 (d,  $J$  = 3.1 Hz), 152.7, 162.4, 164.9; ESI-HRMS: Found:  $m/z$  301.1151. Calcd for  $C_{20}H_{13}FN_2$ :  $(M+H)^+$  301.1141.

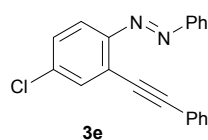

*1-(4-chloro-2-(phenylethynyl)phenyl)-2-phenyldiazene (3e)*. Yield 69% (220 mg); red solid; mp 88-90 °C;  $^1H$  NMR (400 MHz,  $CDCl_3$ )  $\delta$  = 7.35-7.41 (m, 4H), 7.49-7.62 (m, 5H), 7.68-7.75 (m, 2H), 7.98-8.04 (m, 2H);  $^{13}C$  NMR (100MHz,  $CDCl_3$ )  $\delta$  = 85.5, 96.8, 117.4, 123.0, 123.3, 125.3, 128.4, 128.8, 129.2 (overlapped), 131.5, 131.7, 132.8, 136.4, 151.3, 152.7; ESI-HRMS: Found:  $m/z$  317.0847. Calcd for  $C_{20}H_{13}ClN_2$ :  $(M+H)^+$  317.0846.

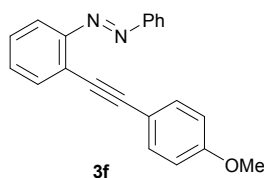

*1-(2-((4-methoxyphenyl)ethynyl)phenyl)-2-phenyldiazene (3f)*. Yield 55% (172 mg); red solid; mp 73-75 °C;  $^1H$  NMR (400 MHz,  $CDCl_3$ )  $\delta$  = 3.84 (s, 3H), 6.88-6.93 (m, 2H), 7.37-7.56 (m, 7H), 7.67-7.76 (m, 2H), 8.00-8.05 (m, 2H);  $^{13}C$  NMR (100MHz,  $CDCl_3$ )  $\delta$  = 55.3, 85.6, 95.8, 114.0, 115.6, 116.1, 123.2, 124.0, 128.5, 129.1, 130.5, 131.2, 133.1, 133.2, 152.89, 152.91, 159.8; ESI-HRMS: Found:  $m/z$  313.1343. Calcd for  $C_{21}H_{16}N_2O$ :  $(M+H)^+$  313.1341.

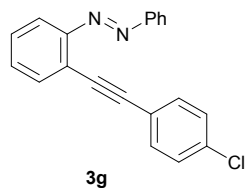

*1-(2-((4-chlorophenyl)ethynyl)phenyl)-2-phenyldiazene (3g)*. Yield 60% (190 mg); red solid; mp 80-82 °C; <sup>1</sup>H NMR (400 MHz, CDCl<sub>3</sub>) δ = 7.31-7.37 (m, 2H), 7.41-7.47 (m, 2H), 7.47-7.58 (m, 5H), 7.67-7.72 (m, 1H), 7.73-7.77 (m, 1H), 7.97-8.04 (m, 2H); <sup>13</sup>C NMR (100MHz, CDCl<sub>3</sub>) δ = 87.8, 94.4, 116.2, 121.9, 123.2, 123.3, 128.7, 129.1 (overlapped), 130.5, 131.4, 132.8, 133.3, 134.4, 152.8, 153.1; ESI-HRMS: Found: m/z 317.0836. Calcd for C<sub>20</sub>H<sub>13</sub>ClN<sub>2</sub>: (M+H)<sup>+</sup> 317.0846.

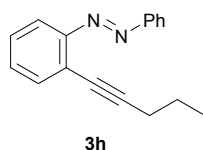

*1-(2-(pent-1-yn-1-yl)phenyl)-2-phenyldiazene (3h)*. Yield 50% (124 mg); red oil; <sup>1</sup>H NMR (400 MHz, CDCl<sub>3</sub>) δ = 1.09 (t, 3H, *J* = 7.3 Hz), 1.61-1.76 (m, 2H), 2.50 (t, 2H, *J* = 6.8 Hz), 7.32-7.41 (m, 2H), 7.46-7.55 (m, 3H), 7.56-7.61 (m, 1H), 7.65-7.70 (m, 1H), 7.95-8.00 (m, 2H); <sup>13</sup>C NMR (100MHz, CDCl<sub>3</sub>) δ = 13.6, 21.8, 22.2, 77.9, 97.0, 115.9, 123.2, 124.6, 128.1, 129.0, 130.4, 131.1, 133.5, 152.9, 153.2; ESI-HRMS: Found: m/z 249.1387. Calcd for C<sub>17</sub>H<sub>16</sub>N<sub>2</sub>: (M+H)<sup>+</sup> 249.1392.

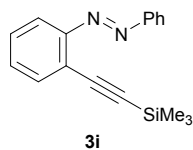

Compound **3i** was prepared by the literature method.<sup>1</sup>

### Synthesis of (3-Isoindazolyl)allenes

General procedure for preparation of (3-isoindazolyl)allene **4a-k** and **4o-s**

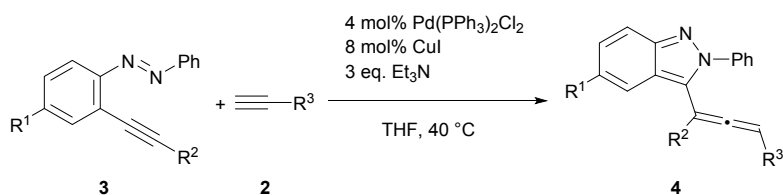

Compound **3** (0.25 mmol, 1.0 equiv), Pd(PPh<sub>3</sub>)<sub>2</sub>Cl<sub>2</sub> (7.0 mg, 0.01 mmol, 0.04 equiv), CuI (3.8 mg, 0.02 mmol, 0.08 equiv) and Et<sub>3</sub>N (108 μL, 0.75 mmol, 3.0 equiv) were dissolved in 2.5 mL anhydrous THF under N<sub>2</sub>. The mixture was immediately purged by N<sub>2</sub> three times. To resulting solution terminal alkyne **2** (0.50 mmol) was added. The mixture was stirred at 40 °C. After the reaction was completed according to TLC reaction control (14-24 h). The solvent was removed in vacuo. The crude residue was purified by column chromatography on silica gel (hexane/ethyl acetate 50:1 to 20:1) to afford desire product.

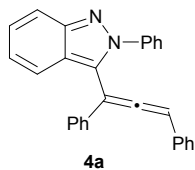

*3-(1,3-diphenylpropa-1,2-dien-1-yl)-2-phenyl-2H-indazole (4a)*. Yield 40% (78 mg); pale yellow solid; mp 138-140 °C; <sup>1</sup>H NMR (400 MHz, CDCl<sub>3</sub>) δ = 6.41 (s, 1H), 7.03-7.10 (m, 3H), 7.16-7.23 (m, 3H), 7.24-7.31 (m, 3H), 7.31-7.41 (m, 6H), 7.48 (d, 1H, *J* = 8.8 Hz), 7.54-7.61 (m, 2H), 7.81 (d, 1H, *J* = 8.8 Hz); <sup>13</sup>C NMR (100MHz, CDCl<sub>3</sub>) δ = 98.6, 103.0, 117.9, 120.6, 122.2, 122.6, 125.5, 126.82, 126.84, 127.2, 127.7, 127.9, 128.3, 128.72, 128.76, 129.0, 129.3, 132.4, 134.5, 140.2, 149.0, 209.5; ESI-HRMS: Found: *m/z* 385.1711. Calcd for C<sub>28</sub>H<sub>20</sub>N<sub>2</sub>: (M+H)<sup>+</sup> 385.1705.

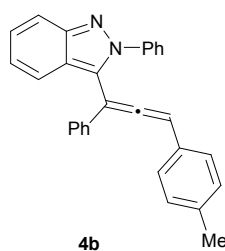

*2-phenyl-3-(1-phenyl-3-(p-tolyl)propa-1,2-dien-1-yl)-2H-indazole (4b)*. Yield 82% (82 mg); pale yellow solid; mp 119-121 °C; <sup>1</sup>H NMR (400 MHz, CDCl<sub>3</sub>) δ = 2.30 (s, 3H), 6.38 (s, 1H), 6.94 (d, 2H, *J* = 8.0 Hz), 7.02 (d, 2H, *J* = 8.0 Hz), 7.03-7.09 (m, 1H), 7.21-7.29 (m, 3H), 7.29-7.40 (m, 6H), 7.47 (d, 1H, *J* = 8.4 Hz), 7.55-7.61 (m, 2H), 7.80 (d, 1H, *J* = 8.8 Hz); <sup>13</sup>C NMR (100MHz, CDCl<sub>3</sub>) δ = 21.2, 98.4, 102.8, 117.9, 120.6, 122.2, 122.5, 125.5, 126.79, 126.83, 127.2, 127.8, 128.3, 128.7, 128.9, 129.3, 129.4, 129.5, 134.7, 137.7, 140.3, 149.0, 209.4; ESI-HRMS: Found: *m/z* 399.1867. Calcd for C<sub>29</sub>H<sub>22</sub>N<sub>2</sub>: (M+H)<sup>+</sup> 399.1861.

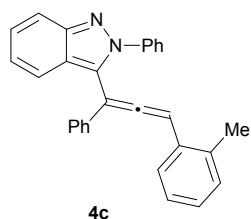

*2-phenyl-3-(1-phenyl-3-(o-tolyl)propa-1,2-dien-1-yl)-2H-indazole (4c)*. Yield 62% (62 mg); pale yellow viscous oil; <sup>1</sup>H NMR (400 MHz, CDCl<sub>3</sub>) δ = 2.22 (s, 3H), 6.52 (s, 1H), 6.95-7.12 (m, 5H), 7.20-7.39 (m, 9H), 7.42 (d, 1H, *J* = 8.4 Hz), 7.53-7.60 (m, 2H), 7.80 (d, 1H, *J* = 8.8 Hz); <sup>13</sup>C NMR (100MHz, CDCl<sub>3</sub>) δ = 19.8, 96.0, 102.1, 117.9, 120.7, 122.1, 122.4, 125.5, 126.2, 126.8 (overlapped), 127.7, 127.8, 127.9, 128.2, 128.7, 128.9, 129.4, 130.6, 130.7, 134.6, 135.4, 140.2, 149.0, 210.0; ESI-HRMS: Found: *m/z* 399.1865. Calcd for C<sub>29</sub>H<sub>22</sub>N<sub>2</sub>: (M+H)<sup>+</sup> 399.1861.

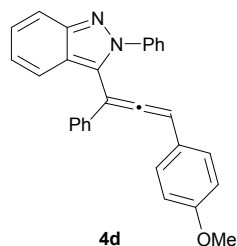

*3-(3-(4-methoxyphenyl)-1-phenylpropa-1,2-dien-1-yl)-2-phenyl-2H-indazole (4d)*. Yield 73% (76 mg); pale yellow viscous oil;  $^1\text{H NMR}$  (400 MHz,  $\text{CDCl}_3$ )  $\delta$  = 3.77 (s, 3H), 6.38 (s, 1H), 6.74 (d, 2H,  $J$  = 8.8 Hz), 6.97 (d, 2H,  $J$  = 8.8 Hz), 7.06 (dd, 1H,  $J$  = 6.8, 8.4 Hz), 7.20-7.29 (m, 3H), 7.29-7.35 (m, 3H), 7.35-7.41 (m, 3H), 7.46 (d, 1H,  $J$  = 8.4 Hz), 7.54-7.60 (m, 2H), 7.80 (d, 1H,  $J$  = 8.8 Hz);  $^{13}\text{C NMR}$  (100MHz,  $\text{CDCl}_3$ )  $\delta$  = 55.3, 98.1, 102.8, 114.2, 117.9, 120.7, 122.2, 122.5, 124.5, 125.5, 126.79, 126.84, 127.8, 128.3, 128.5, 128.7, 129.0, 129.7, 134.8, 140.3, 149.0, 159.3, 209.2; ESI-HRMS: Found:  $m/z$  415.1816. Calcd for  $\text{C}_{29}\text{H}_{22}\text{N}_2\text{O}$ : ( $\text{M}+\text{H}$ ) $^+$  415.1810.

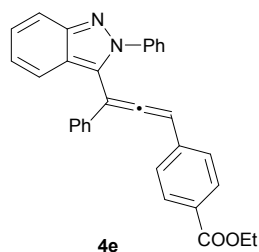

*ethyl 3-(1,3-diphenylpropa-1,2-dien-1-yl)-2-phenyl-2H-indazole-5-carboxylate (4e)*. Yield 66% (78 mg); pale yellow viscous oil;  $^1\text{H NMR}$  (400 MHz,  $\text{CDCl}_3$ )  $\delta$  = 1.38 (t, 3H,  $J$  = 7.2 Hz), 4.36 (q, 2H,  $J$  = 7.2 Hz), 6.45 (s, 1H), 7.05-7.09 (m, 3H), 7.24-7.36 (m, 6H), 7.36-7.41 (m, 3H), 7.44 (d, 1H,  $J$  = 8.5 Hz), 7.54-7.58 (m, 2H), 7.81 (d, 1H,  $J$  = 8.8 Hz), 7.88 (d, 2H,  $J$  = 8.4 Hz);  $^{13}\text{C NMR}$  (100MHz,  $\text{CDCl}_3$ )  $\delta$  = 14.3, 60.9, 98.1, 103.5, 118.0, 120.4, 122.4, 122.6, 125.5, 126.88, 126.91, 127.0, 128.2, 128.5, 128.7, 128.9, 129.0, 129.5, 130.0, 133.9, 137.2, 140.1, 149.0, 166.1, 210.2; ESI-HRMS: Found:  $m/z$  457.1908. Calcd for  $\text{C}_{31}\text{H}_{24}\text{N}_2\text{O}_2$ : ( $\text{M}+\text{H}$ ) $^+$  457.1916.

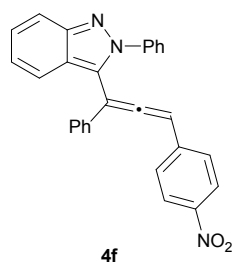

*3-(3-(4-nitrophenyl)-1-phenylpropa-1,2-dien-1-yl)-2-phenyl-2H-indazole (4f)*. Yield: 70% (75 mg); pale yellow solid; mp 179-181 °C;  $^1\text{H NMR}$  (400 MHz,  $\text{CDCl}_3$ )  $\delta$  = 6.46 (s, 1H), 7.06-7.13 (m, 3H), 7.30-7.38 (m, 6H), 7.38-7.45 (m, 4H), 7.51-7.58 (m, 2H), 7.82 (d, 1H,  $J$  = 8.8 Hz), 8.04 (d, 2H,  $J$  = 8.8 Hz);  $^{13}\text{C NMR}$  (100MHz,  $\text{CDCl}_3$ )  $\delta$  = 97.4, 104.2, 118.1, 120.3, 122.7, 124.1, 125.6, 126.99, 127.03, 127.7, 128.1, 128.5, 128.6, 128.7, 129.1, 129.2, 133.4, 139.6, 140.2, 146.9, 149.1, 210.7; ESI-HRMS: Found:  $m/z$  430.1564. Calcd for  $\text{C}_{28}\text{H}_{19}\text{N}_3\text{O}_2$ : ( $\text{M}+\text{H}$ ) $^+$  430.1556.

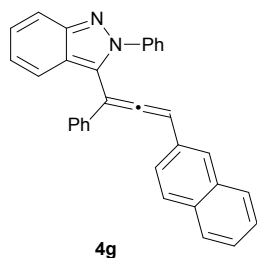

*3-(3-(naphthalen-2-yl)-1-phenylpropa-1,2-dien-1-yl)-2-phenyl-2H-indazole (4g)*. Yield 82% (89 mg); pale yellow solid; mp 95-97 °C; <sup>1</sup>H NMR (400 MHz, CDCl<sub>3</sub>) δ = 6.63 (s, 1H), 7.08-7.21 (m, 2H), 7.26-7.38 (m, 3H), 7.38-7.52 (m, 8H), 7.53-7.60 (m, 2H), 7.61-7.72 (m, 3H), 7.72-7.83 (m, 2H), 7.87 (d, 1H, *J* = 8.8 Hz); <sup>13</sup>C NMR (100MHz, CDCl<sub>3</sub>) δ = 99.0, 103.2, 117.9, 120.6, 122.3, 122.6, 124.7, 125.6 (overlapped), 126.1, 126.3, 126.5, 126.9 (overlapped), 127.7, 127.8, 128.0, 128.4, 128.8, 129.0, 129.3, 129.9, 132.9, 133.5, 134.5, 140.3, 149.0, 210.1; ESI-HRMS: Found: *m/z* 435.1858. Calcd for C<sub>32</sub>H<sub>22</sub>N<sub>2</sub>: (M+H)<sup>+</sup> 435.1861.

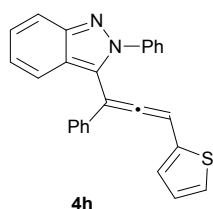

*2-phenyl-3-(1-phenyl-3-(thiophen-2-yl)propa-1,2-dien-1-yl)-2H-indazole (4h)*. Yield 79% (77 mg); pale yellow viscous oil; <sup>1</sup>H NMR (400 MHz, CDCl<sub>3</sub>) δ = 6.67 (s, 1H), 6.83-6.87 (m, 1H), 6.92 (dd, 1H, *J* = 3.6, 5.2 Hz), 7.05-7.11 (m, 1H), 7.15-7.19 (m, 1H), 7.20-7.28 (m, 5H), 7.31-7.40 (m, 4H), 7.52 (d, 1H, *J* = 8.4 Hz), 7.58-7.63 (m, 2H), 7.80 (d, 1H, *J* = 8.8 Hz); <sup>13</sup>C NMR (100MHz, CDCl<sub>3</sub>) δ = 92.6, 103.3, 117.9, 120.6, 122.3, 122.7, 125.4, 125.6, 126.3, 126.9, 127.1, 127.6, 128.0, 128.3, 128.7, 128.9, 129.0, 134.4, 136.0, 140.2, 149.0, 209.3; ESI-HRMS: Found: *m/z* 391.1272. Calcd for C<sub>26</sub>H<sub>18</sub>N<sub>2</sub>S: (M+H)<sup>+</sup> 391.1269.

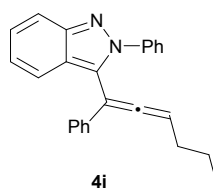

*2-phenyl-3-(1-phenylhexa-1,2-dien-1-yl)-2H-indazole (4i)*. Yield 50% (44 mg); pale yellow viscous oil; <sup>1</sup>H NMR (400 MHz, CDCl<sub>3</sub>) δ = 0.80 (t, 3H, *J* = 7.2 Hz), 1.17-1.35 (m, 2H), 1.69-1.82 (m, 2H), 5.40 (t, 1H, *J* = 7.2 Hz), 6.99-7.06 (m, 1H), 7.17-7.25 (m, 2H), 7.26-7.30 (m, 3H), 7.30-7.42 (m, 5H), 7.55-7.61 (m, 2H), 7.80 (d, 1H, *J* = 8.8 Hz); <sup>13</sup>C NMR (100MHz, CDCl<sub>3</sub>) δ = 13.7, 22.4, 30.0, 95.3, 98.8, 117.8, 120.8, 121.8, 122.3, 125.4, 126.6, 126.7, 127.2, 128.1, 128.5, 128.8, 130.4, 135.5, 140.3, 148.9, 206.9; ESI-HRMS: Found: *m/z* 351.1853. Calcd for C<sub>25</sub>H<sub>22</sub>N<sub>2</sub>: (M+H)<sup>+</sup> 351.1861.



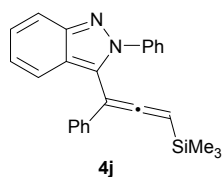

*2-phenyl-3-(1-phenyl-3-(trimethylsilyl)propa-1,2-dien-1-yl)-2H-indazole (4j)*. Yield 80% (76 mg); pale yellow viscous oil;  $^1\text{H}$  NMR (400 MHz,  $\text{CDCl}_3$ )  $\delta$  = 0.15 (s, 9H), 5.36 (s, 1H), 7.09-7.15 (m, 1H), 7.20-7.28 (m, 3H), 7.28-7.35 (m, 2H), 7.37-7.47 (m, 4H), 7.52 (d, 1H,  $J$  = 8.4 Hz), 7.65-7.67 (m, 2H), 7.87 (d, 1H,  $J$  = 8.8 Hz);  $^{13}\text{C}$  NMR (100MHz,  $\text{CDCl}_3$ )  $\delta$  = -0.8, 87.0, 92.5, 117.8, 120.8, 121.8, 122.6, 125.2, 125.9, 126.6, 126.8, 128.1, 128.6, 128.8, 130.0, 135.2, 140.3, 149.0, 209.8; ESI-HRMS: Found:  $m/z$  381.1795. Calcd for  $\text{C}_{25}\text{H}_{24}\text{N}_2\text{Si}$ : ( $\text{M}+\text{H}$ ) $^+$  381.1787.

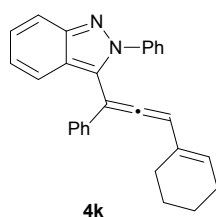

*3-(3-(cyclohex-1-en-1-yl)-1-phenylpropa-1,2-dien-1-yl)-2-phenyl-2H-indazole (4k)*. Yield 65% (63 mg); pale yellow viscous oil;  $^1\text{H}$  NMR (400 MHz,  $\text{CDCl}_3$ )  $\delta$  = 1.40-1.70 (m, 5H), 1.83-1.98 (m, 1H), 2.00-2.12 (m, 2H), 5.67 (t, 1H,  $J$  = 4.0 Hz), 6.07 (s, 1H), 7.02-7.09 (m, 1H), 7.16-7.29 (m, 5H), 7.29-7.41 (m, 4H), 7.46 (d, 1H,  $J$  = 8.4 Hz), 7.54-7.60 (m, 2H), 7.80 (d, 1H,  $J$  = 8.8 Hz);  $^{13}\text{C}$  NMR (100MHz,  $\text{CDCl}_3$ )  $\delta$  = 22.1, 22.4, 25.8, 25.9, 101.76, 101.82, 117.8, 120.7, 122.0, 122.5, 125.3, 126.6, 126.8, 127.5, 128.2, 128.6, 128.7, 128.8, 130.1, 131.0, 135.4, 140.3, 148.9, 208.4. ESI-HRMS: Found:  $m/z$  389.2024. Calcd for  $\text{C}_{28}\text{H}_{24}\text{N}_2$ : ( $\text{M}+\text{H}$ ) $^+$  389.2018.

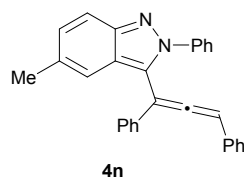

*3-(1,3-diphenylpropa-1,2-dien-1-yl)-5-methyl-2-phenyl-2H-indazole (4n)*. Yield 85% (85 mg); pale yellow solid; mp 151-153  $^{\circ}\text{C}$ ;  $^1\text{H}$  NMR (400 MHz,  $\text{CDCl}_3$ )  $\delta$  = 2.35 (s, 3H), 6.40 (s, 1H), 7.03-7.07 (m, 2H), 7.17-7.29 (m, 8H), 7.29-7.39 (m, 5H), 7.52-7.59 (m, 2H), 7.70 (d, 1H,  $J$  = 8.8 Hz);  $^{13}\text{C}$  NMR (100MHz,  $\text{CDCl}_3$ )  $\delta$  = 21.8, 98.4, 103.0, 117.6, 118.5, 122.8, 125.4, 126.7, 127.2, 127.6, 127.8, 128.16, 128.21, 128.66, 128.74, 128.9, 129.8, 131.7, 132.4, 134.5, 140.3, 148.0, 209.4; ESI-HRMS: Found:  $m/z$  399.1859. Calcd for  $\text{C}_{29}\text{H}_{22}\text{N}_2$ : ( $\text{M}+\text{H}$ ) $^+$  399.1861.

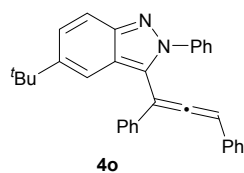

5-(*tert*-butyl)-3-(1,3-diphenylpropa-1,2-dien-1-yl)-2-phenyl-2H-indazole (**4o**). Yield 85% (94 mg); pale yellow solid; mp 155-157 °C; <sup>1</sup>H NMR (400 MHz, CDCl<sub>3</sub>) δ = 1.26 (s, 9H), 6.51 (s, 1H), 7.13-7.16 (m, 2H), 7.17-7.27 (m, 6H), 7.27-7.37 (m, 6H), 7.46 (dd, 1H, *J* = 2.0, 9.2 Hz), 7.54-7.57 (m, 2H), 7.74 (d, 1H, *J* = 9.2 Hz); <sup>13</sup>C NMR (100MHz, CDCl<sub>3</sub>) δ = 31.1, 34.8, 98.5, 103.2, 114.7, 117.4, 122.5, 125.4, 126.7, 126.9, 127.4, 127.7, 127.8, 128.1, 128.6, 128.75, 128.85, 129.0, 132.6, 134.4, 140.5, 144.9, 147.8, 209.4; ESI-HRMS: Found: *m/z* 441.2333. Calcd for C<sub>32</sub>H<sub>28</sub>N<sub>2</sub>: (M+H)<sup>+</sup> 441.2331.

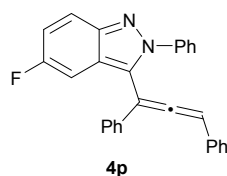

3-(1,3-diphenylpropa-1,2-dien-1-yl)-5-fluoro-2-phenyl-2H-indazole (**4p**). Yield 74% (74 mg); pale yellow viscous oil; <sup>1</sup>H NMR (400 MHz, CDCl<sub>3</sub>) δ = 6.40 (s, 1H), 6.99-7.08 (m, 3H), 7.09-7.34 (m, 9H), 7.34-7.41 (m, 3H), 7.52-7.59 (m, 2H), 7.77 (dd, 1H, *J* = 4.8, 5.6 Hz); <sup>13</sup>C NMR (100MHz, CDCl<sub>3</sub>) δ = 98.7, 102.7, 103.0 (d, *J* = 24.3 Hz), 118.5 (d, *J* = 28.9 Hz), 120.1 (d, *J* = 9.6 Hz), 121.9 (d, *J* = 11.9 Hz), 125.4, 126.7, 127.2, 127.8, 128.0, 128.5, 128.75, 128.85, 129.0, 132.2, 134.2, 140.1, 146.4, 157.2, 159.6, 209.5; ESI-HRMS: Found: *m/z* 403.1618. Calcd for C<sub>28</sub>H<sub>19</sub>FN<sub>2</sub>: (M+H)<sup>+</sup> 403.1611.

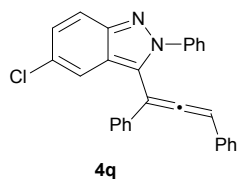

5-chloro-3-(1,3-diphenylpropa-1,2-dien-1-yl)-2-phenyl-2H-indazole (**4q**). Yield 75% (79 mg); pale yellow solid; mp 142-144 °C; <sup>1</sup>H NMR (400 MHz, CDCl<sub>3</sub>) δ = 6.42 (s, 1H), 7.00-7.08 (m, 2H), 7.13-7.24 (m, 3H), 7.24-7.34 (m, 6H), 7.34-7.42 (m, 3H), 7.45 (s, 1H), 7.52-7.61 (m, 2H), 7.73 (d, 1H, *J* = 9.2 Hz); <sup>13</sup>C NMR (100MHz, CDCl<sub>3</sub>) δ = 98.8, 102.5, 119.2, 119.5, 122.9, 125.4, 126.7, 127.2, 127.83, 127.86, 128.1, 128.3, 128.6, 128.8, 128.9, 129.0, 129.2, 132.1, 134.1, 149.9, 147.3, 209.5; ESI-HRMS: Found: *m/z* 419.1310. Calcd for C<sub>28</sub>H<sub>19</sub>ClN<sub>2</sub>: (M+H)<sup>+</sup> 419.1315.

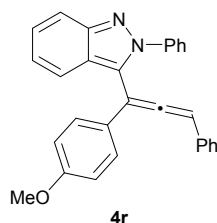

3-(1-(4-methoxyphenyl)-3-phenylpropa-1,2-dien-1-yl)-2-phenyl-2H-indazole (**4r**). Yield 72% (75 mg); pale yellow viscous oil; <sup>1</sup>H NMR (400 MHz, CDCl<sub>3</sub>) δ = 3.78 (s, 3H), 6.36 (s, 1H), 6.78-6.85 (m, 2H), 6.99-7.10 (m, 3H), 7.14-7.22 (m, 3H), 7.22-7.28 (m, 2H), 7.30-7.42 (m, 4H), 7.48 (d, 1H, *J* = 8.4 Hz), 7.54-7.61 (m, 2H), 7.80 (d, 1H, *J* = 8.4 Hz); <sup>13</sup>C NMR (100MHz, CDCl<sub>3</sub>) δ = 55.3, 98.6, 102.5, 114.2, 117.9, 120.7, 122.2, 122.5, 125.5, 126.6, 126.8, 127.2, 127.6, 128.1, 128.4,

128.7, 129.0, 129.6, 132.7, 140.3, 149.0, 159.4, 208.9; ESI-HRMS: Found:  $m/z$  415.1801. Calcd for  $C_{29}H_{22}N_2O$ :  $(M+H)^+$  415.1810.

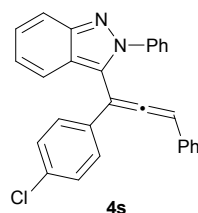

*3-(1-(4-chlorophenyl)-3-phenylpropa-1,2-dien-1-yl)-2-phenyl-2H-indazole (4s)*. Yield 73% (76 mg); pale yellow viscous oil;  $^1H$  NMR (400 MHz,  $CDCl_3$ )  $\delta$  = 6.43 (s, 1H), 6.99-7.12 (m, 3H), 7.16-7.27 (m, 7H), 7.30-7.42 (m, 4H), 7.45 (d, 1H,  $J$  = 8.8 Hz), 7.51-7.59 (m, 2H), 7.80 (d, 1H,  $J$  = 8.8 Hz);  $^{13}C$  NMR (100MHz,  $CDCl_3$ )  $\delta$  = 99.0, 102.2, 118.0, 120.4, 122.4, 122.5, 125.5, 126.9, 127.3, 127.9, 128.0, 128.5, 128.76, 128.79, 128.97, 129.04, 132.0, 133.0, 133.8, 140.1, 149.0, 209.5; ESI-HRMS: Found:  $m/z$  419.1313. Calcd for  $C_{28}H_{19}ClN_2$ :  $(M+H)^+$  419.1315.

One-pot procedure for the preparation of (3-isoindazolyl)allene from substituted 2-iodoazobenzene and terminal alkyne

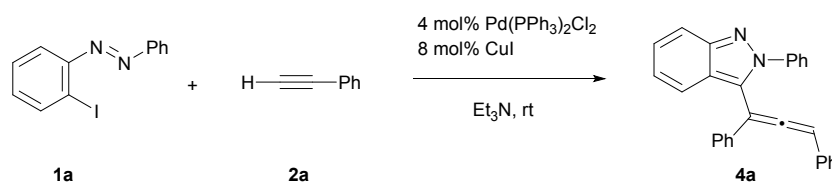

The 1-(2-iodophenyl)-2-phenyldiazene **1a** (1.0 mmol, 1 equiv),  $Pd(PPh_3)_2Cl_2$  (28.1 mg, 0.04 mmol, 0.04 equiv),  $CuI$  (15.2 mg, 0.08 mmol, 0.08 equiv) were dissolved in 10 mL  $Et_3N$  under  $N_2$ . The mixture was immediately purged by  $N_2$  three times. To resulting solution phenylacetylene **2a** (3.0 mmol, 3.0 equiv) was added dropwise. The mixture was stirred at room temperature for overnight. Then the reaction mixture was concentrated in vacuo. The crude residue was purified by column chromatography on silica gel (hexane/ethyl acetate 50:1 to 20:1) to afford compound **4a** in 40% yield (154 mg).

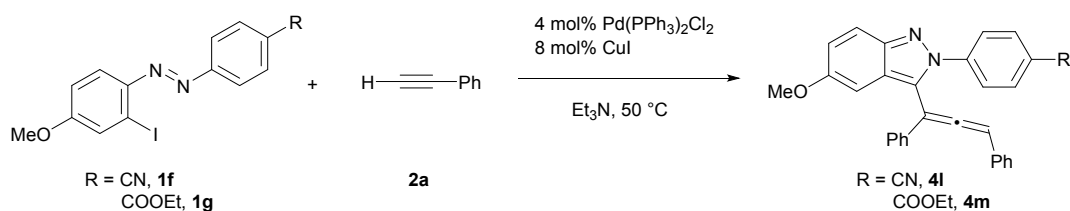

The substituted 2-iodoazobenzene **1f/1g** (0.25 mmol, 1 equiv),  $Pd(PPh_3)_2Cl_2$  (7.0 mg, 0.01 mmol, 0.04 equiv),  $CuI$  (3.8 mg, 0.02 mmol, 0.08 equiv) were dissolved in 2.5 mL  $Et_3N$  under  $N_2$ . The mixture was immediately purged by  $N_2$  three times. To resulting solution phenylacetylene **2a** (0.75 mmol, 3.0 equiv) was added dropwise. The mixture was stirred at 50 °C for overnight. Then the reaction mixture was concentrated in vacuo. The crude residue was purified by column chromatography on silica gel (hexane/ethyl acetate 50:1 to 20:1) to afford desired product.

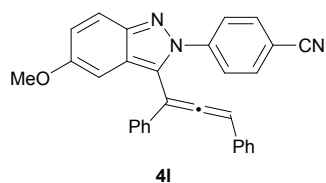

*4-(3-(1,3-diphenylpropa-1,2-dien-1-yl)-5-methoxy-2H-indazol-2-yl)benzonitrile (4l)*. Yield 49% (54 mg); pale yellow viscous oil; <sup>1</sup>H NMR (400 MHz, CDCl<sub>3</sub>) δ = 3.57 (s, 3H), 6.56 (d, 1H, *J* = 2.1 Hz), 6.60 (s, 1H), 7.02-7.08 (m, 1H), 7.15-7.22 (m, 2H), 7.22-7.33 (m, 8H), 7.60 (d, 2H, *J* = 8.4 Hz), 7.66 (d, 1H, *J* = 9.6 Hz), 7.74 (d, 2H, *J* = 8.4 Hz); <sup>13</sup>C NMR (100 MHz, CDCl<sub>3</sub>) δ = 55.2, 96.3, 98.8, 103.0, 111.4, 118.1, 119.4, 123.2, 123.3, 125.3, 126.8, 127.4, 128.1, 128.20, 128.25, 128.86, 128.94, 132.4, 132.8, 133.7, 143.7, 146.5, 155.8, 209.3; ESI-HRMS: Found: *m/z* 440.1760. Calcd for C<sub>30</sub>H<sub>21</sub>N<sub>3</sub>O: (M+H)<sup>+</sup> 440.1763.

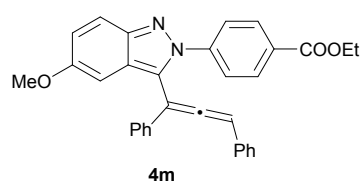

*ethyl 4-(3-(1,3-diphenylpropa-1,2-dien-1-yl)-5-methoxy-2H-indazol-2-yl)benzoate (4m)*. Yield 60% (73 mg); pale yellow viscous oil; <sup>1</sup>H NMR (400 MHz, CDCl<sub>3</sub>) δ = 1.41 (t, 3H, *J* = 7.2 Hz), 3.60 (s, 3H), 4.39 (q, 2H, *J* = 7.1 Hz), 6.55 (s, 1H), 6.59 (d, 1H, *J* = 2.4 Hz), 7.05 (dd, 1H, *J* = 2.4, 9.6 Hz), 7.08-7.37 (m, 10H), 7.53-7.75 (m, 3H), 8.02 (d, 2H, *J* = 8.6 Hz); <sup>13</sup>C NMR (100 MHz, CDCl<sub>3</sub>) δ = 14.3, 55.2, 61.2, 96.4, 98.6, 103.1, 119.4, 122.6, 123.1, 124.7, 126.8, 127.4, 127.8, 128.0, 128.1, 128.76, 128.84, 129.7, 130.3, 132.5, 134.0, 143.8, 146.2, 155.6, 165.8, 209.3; ESI-HRMS: Found: *m/z* 487.2021. Calcd for C<sub>32</sub>H<sub>26</sub>N<sub>2</sub>O<sub>3</sub>: (M+H)<sup>+</sup> 487.2022.

### Control reactions

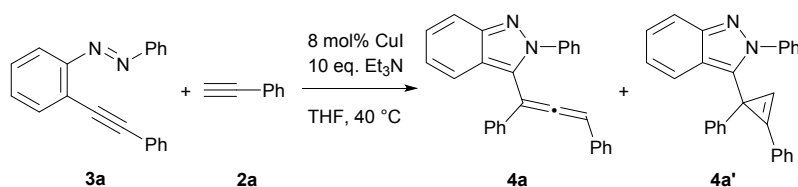

Compound **3a** (71 mg, 0.25 mmol), CuI (3.8 mg, 0.02 mmol) and Et<sub>3</sub>N (360 μL, 2.5 mmol) were dissolved in 2.5 mL anhydrous THF under N<sub>2</sub>. The mixture was immediately purged by N<sub>2</sub> three times. To resulting solution phenylacetylene **2a** (0.5 mmol) was added. The mixture was stirred at 40 °C for 24 h. The solvent was removed in vacuo. The crude residue was purified by column chromatography on silica gel (hexane/ethyl acetate 50:1 to 20:1) to afford **4a** and **4a'** in 49% and 30% yield respectively.

*3-(1,2-diphenylcycloprop-2-en-1-yl)-2-phenyl-2H-indazole (4a')*. Yield 30% (29 mg); pale yellow viscous oil; <sup>1</sup>H NMR (400 MHz, CDCl<sub>3</sub>) δ = 6.65 (s, 1H), 6.99-7.05 (m, 1H), 7.15-7.23 (m, 3H), 7.23-7.33 (m, 6H), 7.37-7.45 (m, 5H), 7.47-7.53 (m, 2H), 7.66 (d, 1H, *J* = 8.4 Hz), 7.75 (d, 1H, *J* = 8.8 Hz); <sup>13</sup>C NMR (100MHz, CDCl<sub>3</sub>) δ = 27.7, 103.8, 117.8, 120.7, 121.1, 121.4, 121.9, 126.0,

126.1, 126.3, 126.4, 126.5, 128.4, 128.7, 128.75, 128.82, 129.3, 129.6, 139.0, 140.5, 145.4, 148.8;  
ESI-HRMS: Found: m/z 385.1712. Calcd for C<sub>28</sub>H<sub>20</sub>N<sub>2</sub>: (M+H)<sup>+</sup> 385.1705.

#### Thermal Cyclization of Compound 4a

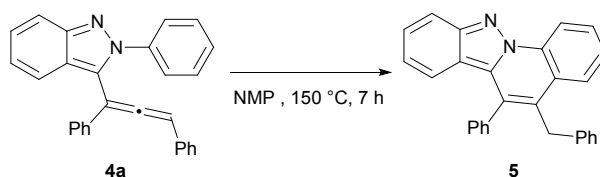

Compound **4a** (96 mg, 0.25 mmol) was dissolved in 2.5 mL anhydrous NMP in a 10 ml seal tube. The mixture was immediately purged by N<sub>2</sub> three times and then stirred at 150 °C for 2 h. After the reaction was completed, the solvent was evaporated under vacuum. The crude residue was purified by column chromatography (hexane/ethyl acetate 20:1) on silica gel to afford 5-benzyl-6-phenylindazolo[2,3-*a*]quinoline **5** as a white solid; mp 197-199 °C; yield 53% (51 mg); <sup>1</sup>H NMR (400 MHz, CDCl<sub>3</sub>) δ = 4.33 (s, 2H), 6.51 (d, 1H, *J* = 8.5 Hz), 6.81-6.93 (m, 1H), 7.07 (d, 2H, *J* = 6.8 Hz), 7.10-7.26 (m, 3H), 7.37-7.45 (m, 3H), 7.45-7.58 (m, 4H), 7.69-7.79 (m, 1H), 7.86-7.97 (m, 2H), 9.06 (d, 1H, *J* = 8.4 Hz); <sup>13</sup>C NMR (100MHz, CDCl<sub>3</sub>) δ = 34.5, 116.3, 117.3, 117.6, 120.4, 121.5, 124.8, 126.0, 126.2, 126.5, 127.6, 128.0, 128.5, 128.6, 128.9, 129.0, 129.1, 129.4, 131.7, 131.9, 133.9, 136.6, 140.2, 149.4; ESI-HRMS: Found: m/z 385.1709. Calcd for C<sub>28</sub>H<sub>20</sub>N<sub>2</sub>: (M+H)<sup>+</sup> 385.1705.

## Reference

1. Shirtcliff, L. D.; Weakley, T. J. R.; Haley, M. M. *J. Org. Chem.* **2004**, *69*, 6979.

# <sup>1</sup>H and <sup>13</sup>C NMR spectra

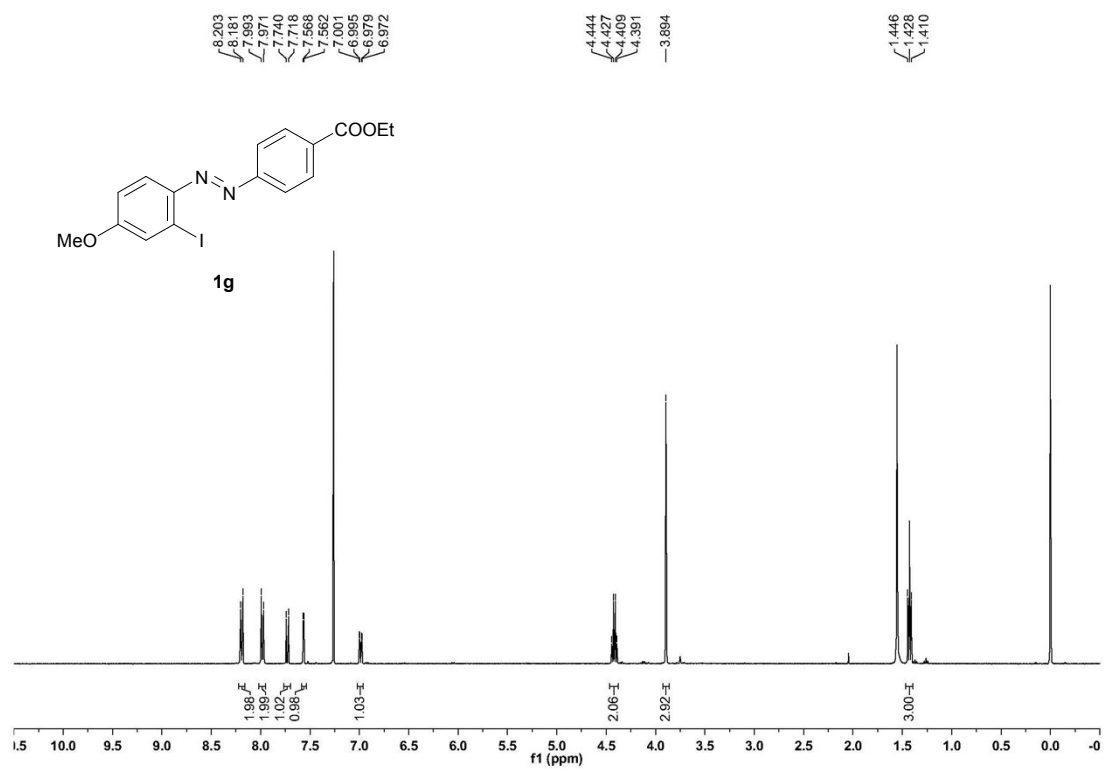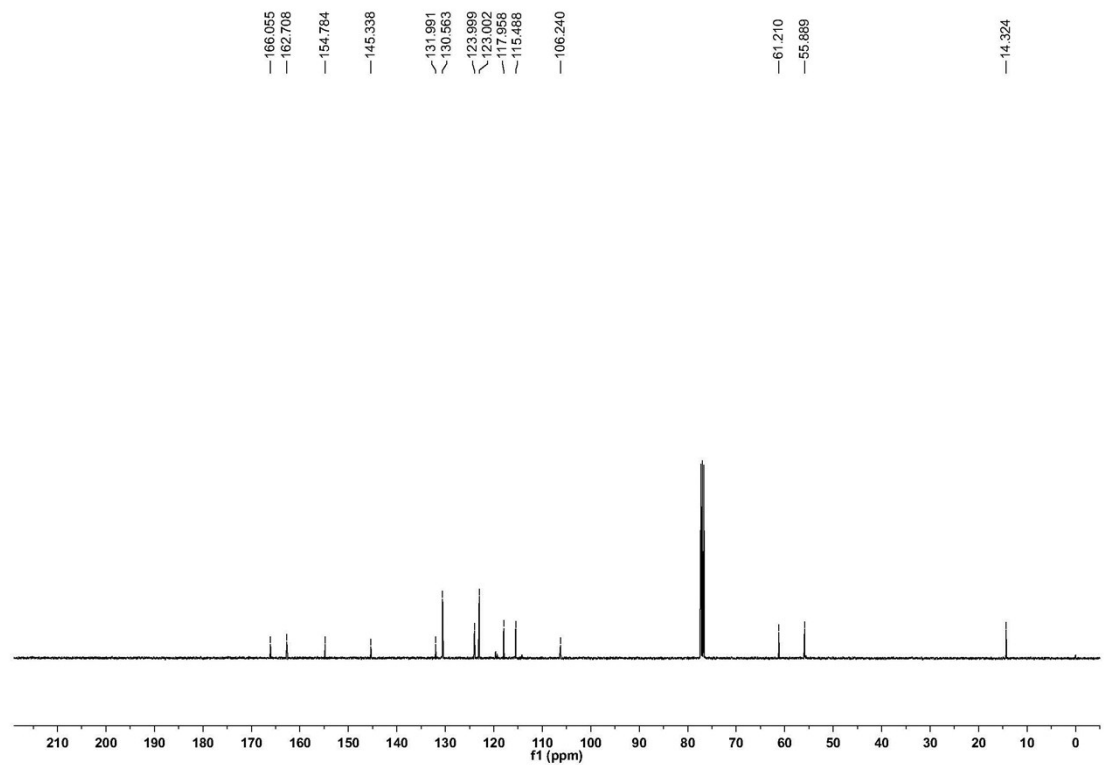

8.034  
8.016  
7.762  
7.758  
7.755  
7.745  
7.739  
7.729  
7.723  
7.714  
7.710  
7.706  
7.693  
7.690  
7.584  
7.579  
7.558  
7.541  
7.536  
7.522  
7.515  
7.511  
7.507  
7.494  
7.455  
7.450  
7.447  
7.440  
7.432  
7.428  
7.423  
7.378  
7.373  
7.365  
7.360

8.034  
8.016  
7.762  
7.758  
7.745  
7.739  
7.729  
7.723  
7.714  
7.710  
7.706  
7.603  
7.586  
7.591  
7.584  
7.579  
7.558  
7.541  
7.526  
7.522  
7.515  
7.507  
7.494  
7.455  
7.450  
7.447  
7.440  
7.432  
7.428  
7.423  
7.378  
7.373  
7.365  
7.360

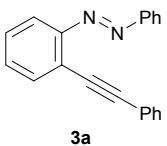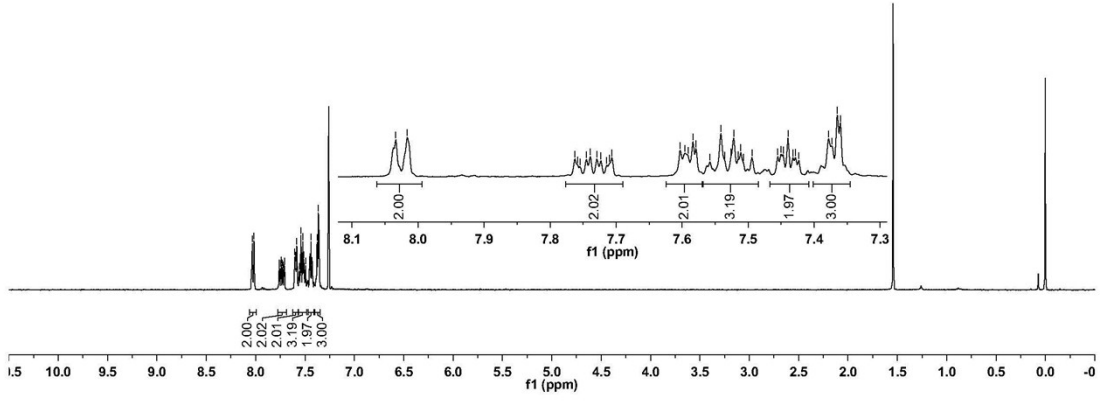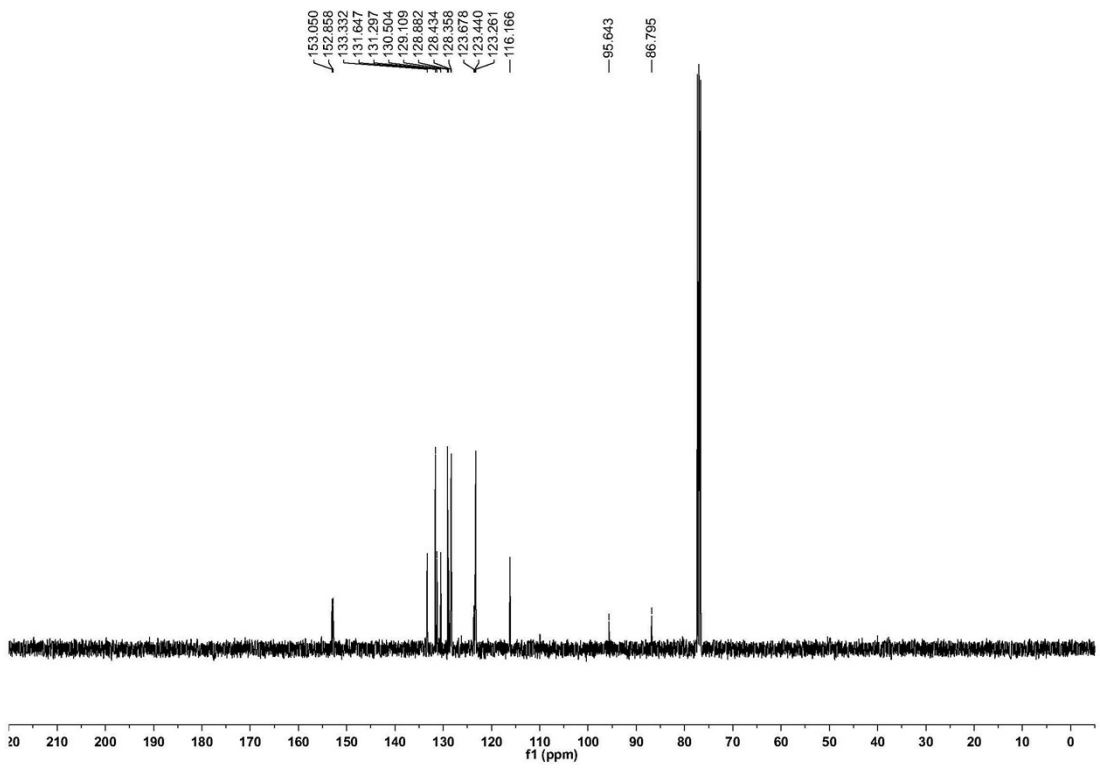



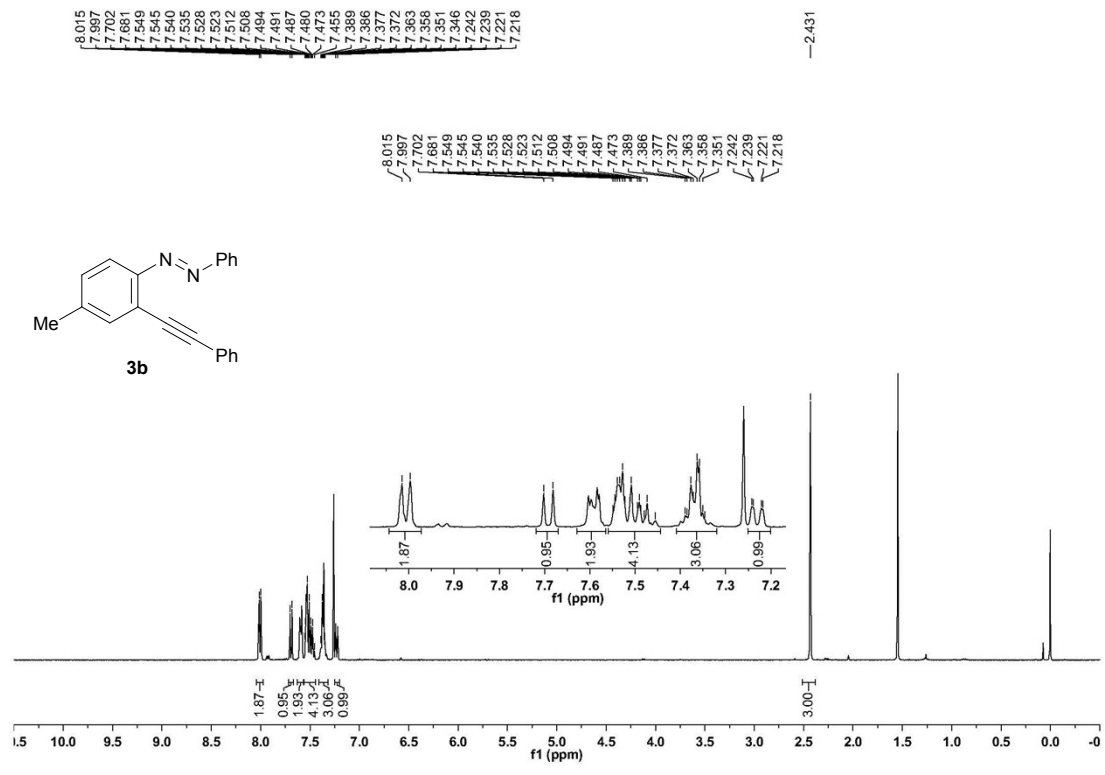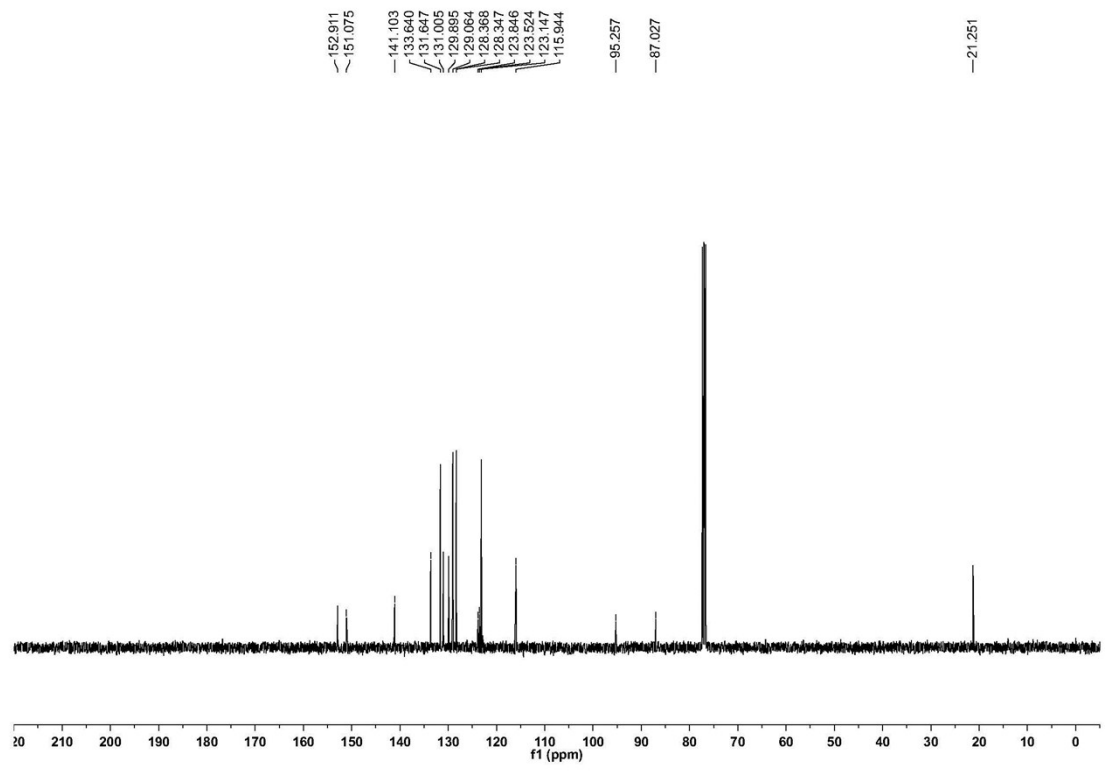

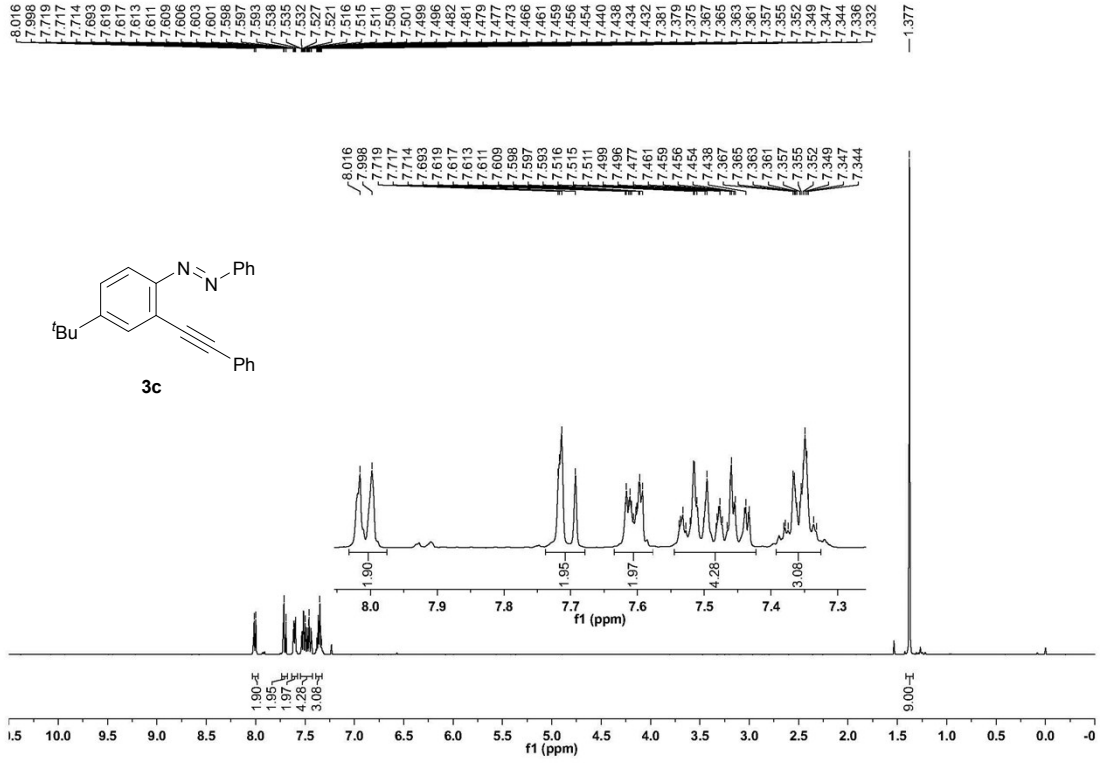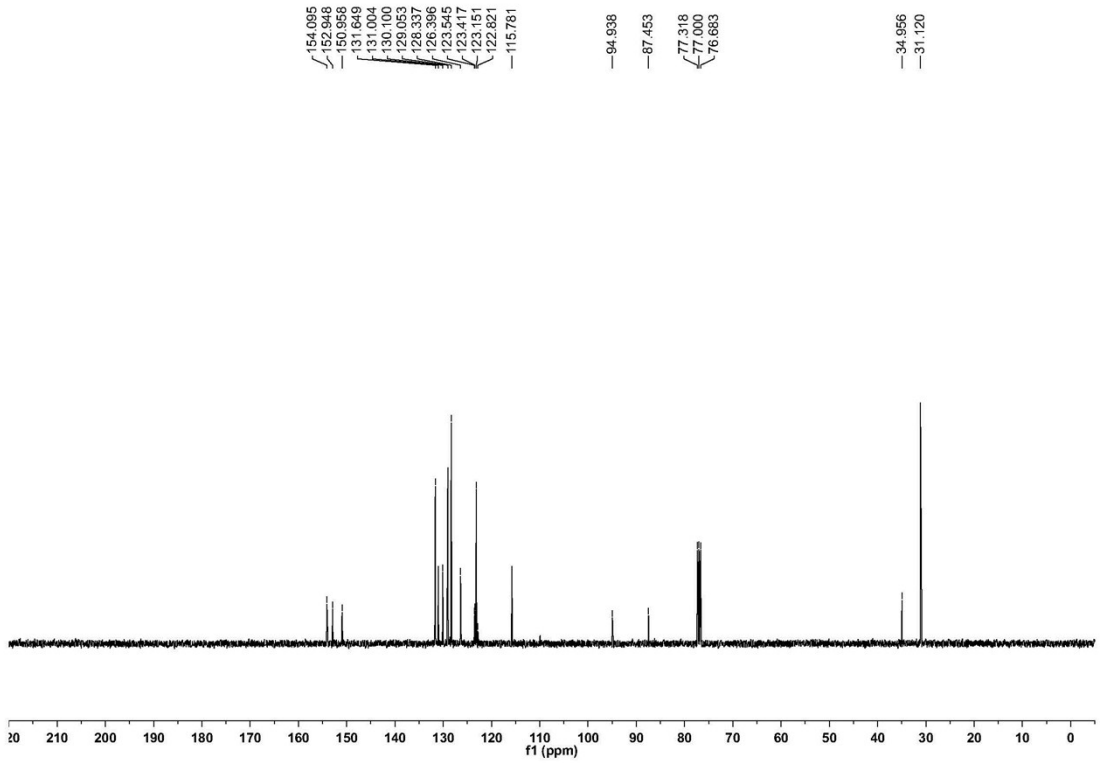

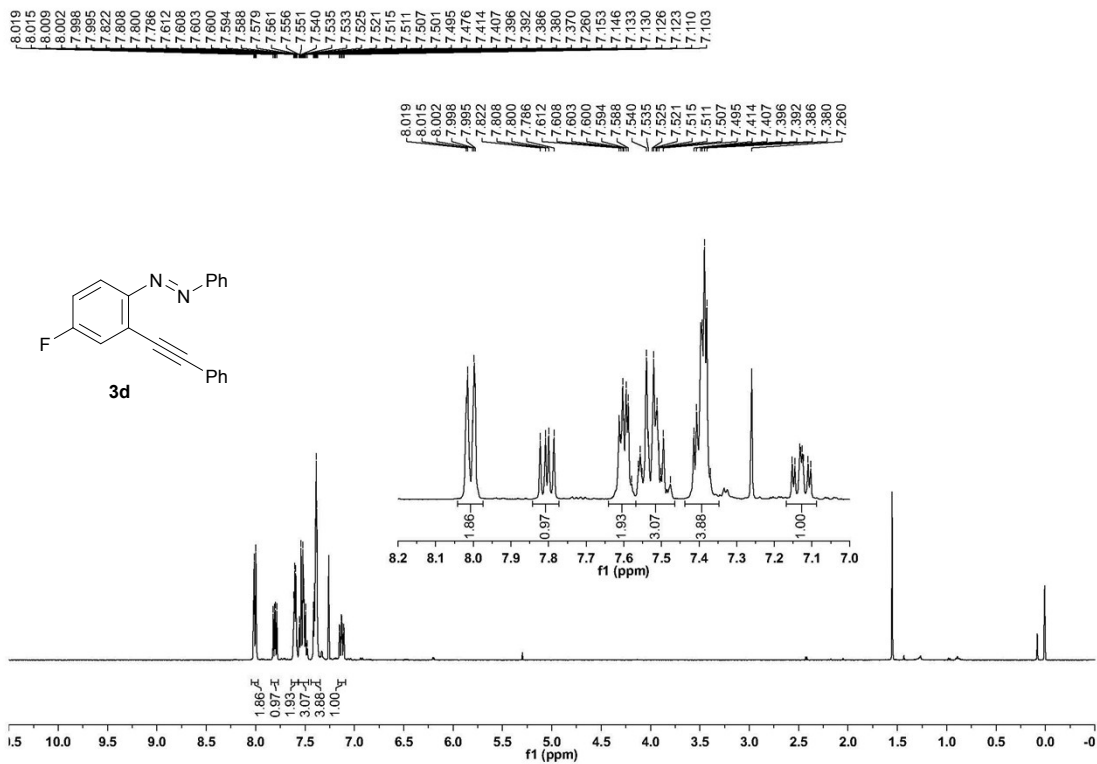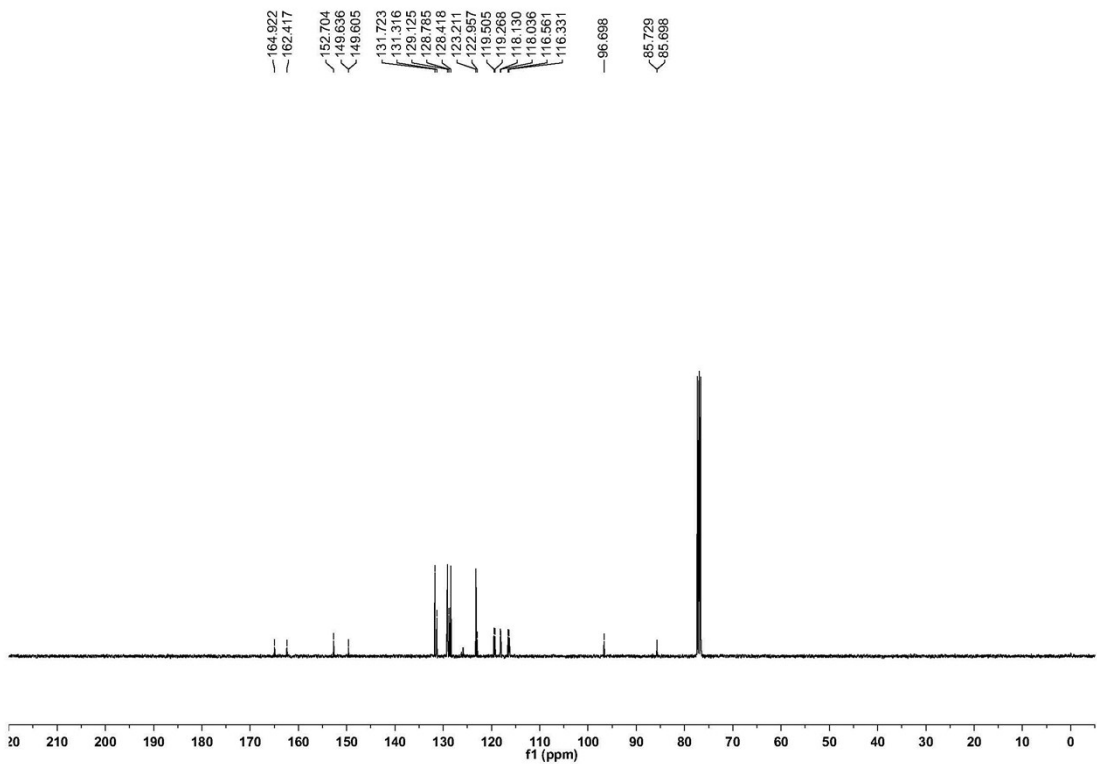

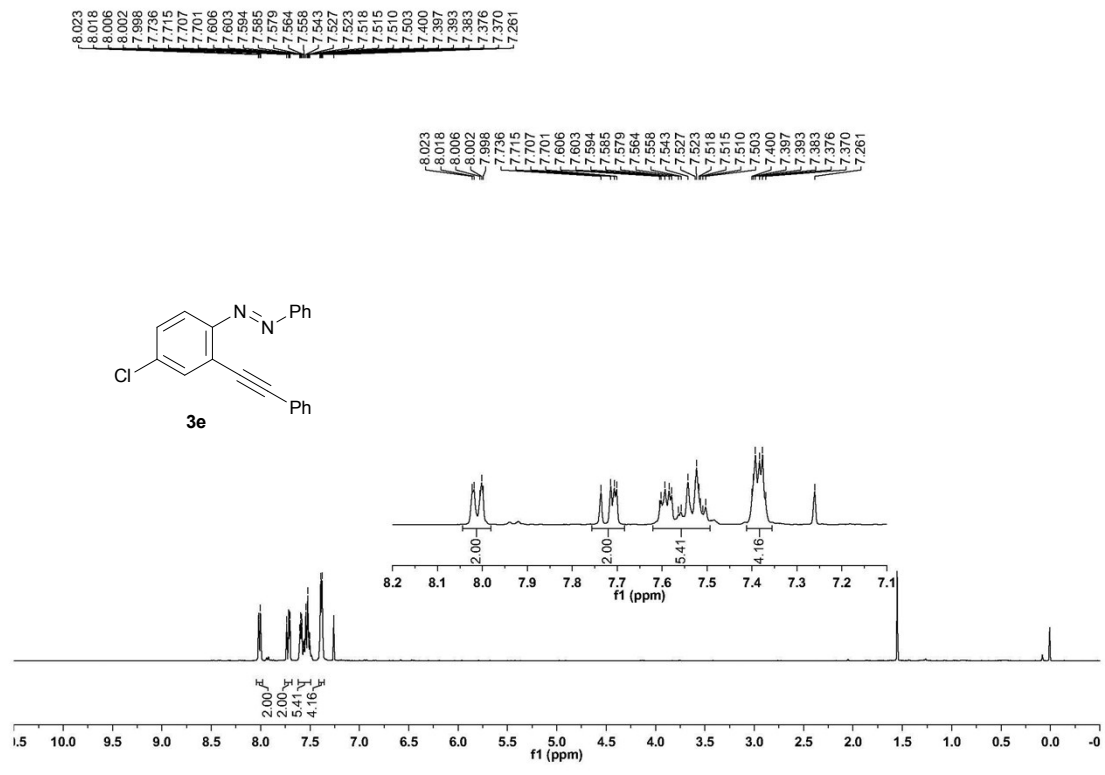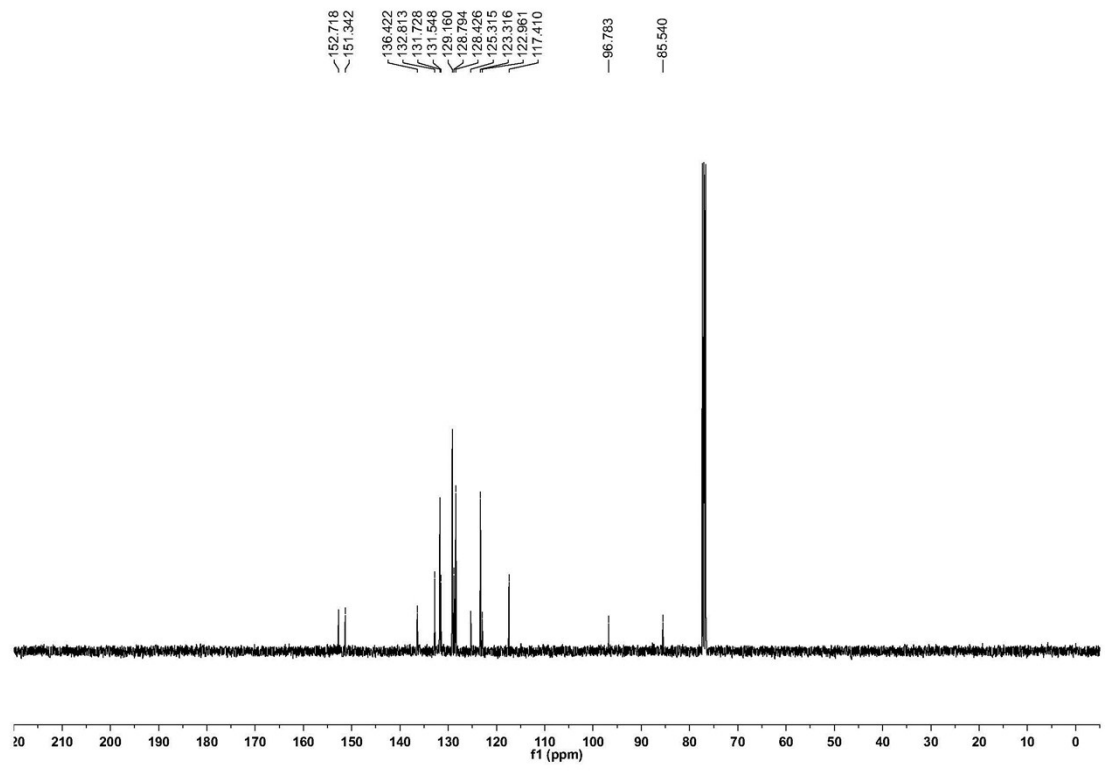

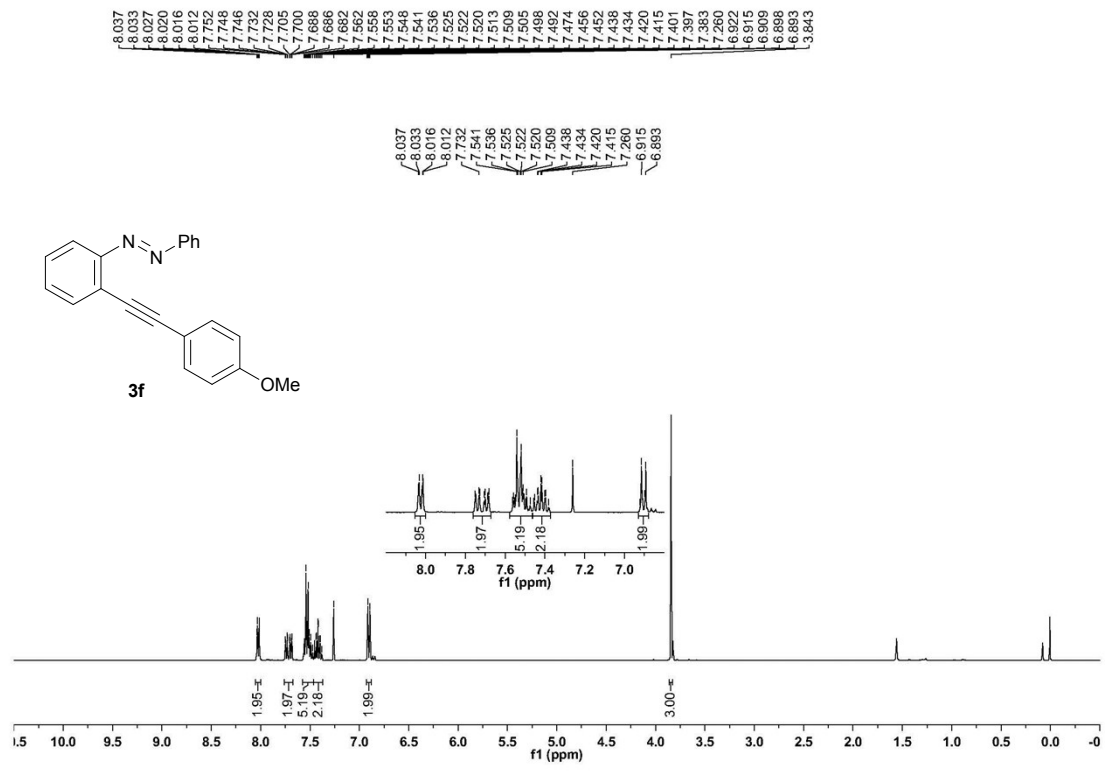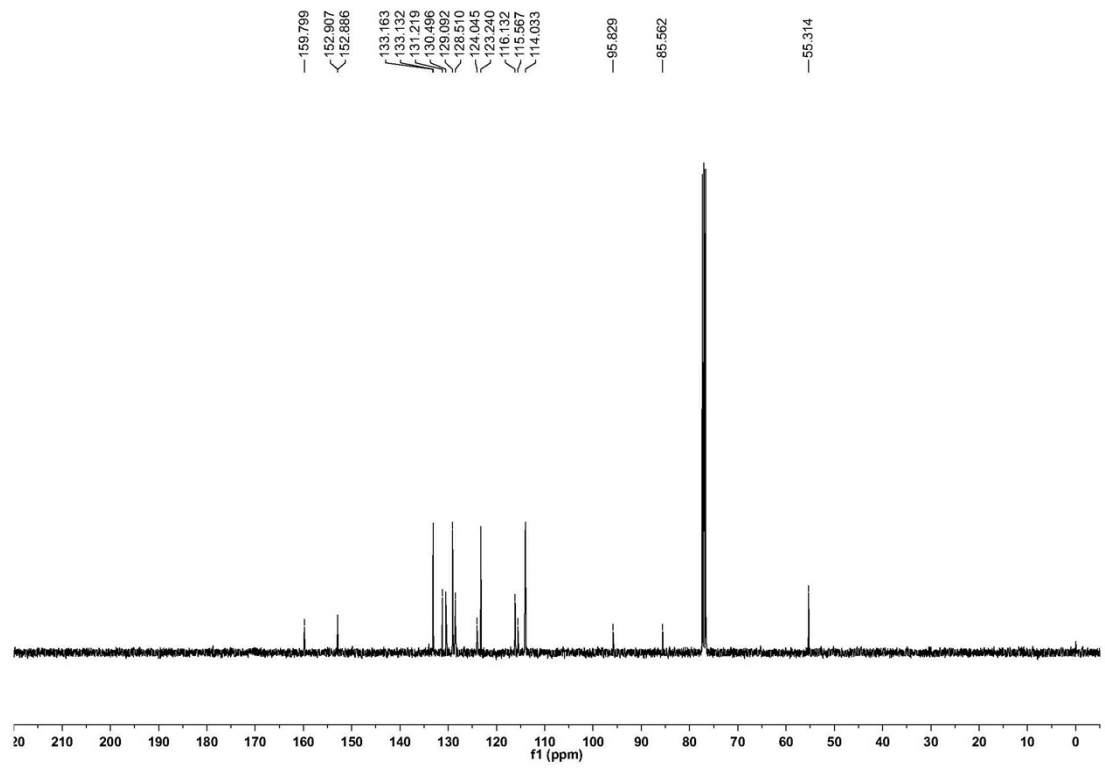

8.022  
8.020  
8.015  
8.010  
8.003  
7.999  
7.995  
7.764  
7.759  
7.752  
7.751  
7.747  
7.740  
7.719  
7.717  
7.703  
7.696  
7.691  
7.565  
7.560  
7.558  
7.554  
7.550  
7.545  
7.543  
7.539  
7.536  
7.528  
7.524  
7.522  
7.516  
7.511  
7.506  
7.502  
7.497  
7.491  
7.486  
7.483  
7.472  
7.459  
7.457  
7.453  
7.447  
7.439  
7.436  
7.433  
7.421  
7.364  
7.358  
7.343  
7.341  
7.337  
7.330  
7.260

8.020  
8.015  
8.003  
7.999  
7.995  
7.764  
7.752  
7.740  
7.733  
7.703  
7.691  
7.545  
7.543  
7.539  
7.536  
7.528  
7.524  
7.522  
7.518  
7.514  
7.502  
7.497  
7.459  
7.457  
7.453  
7.447  
7.439  
7.436  
7.433  
7.421  
7.364  
7.358  
7.343  
7.341  
7.337  
7.260

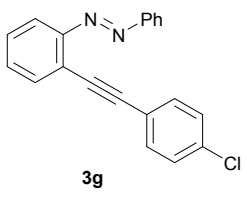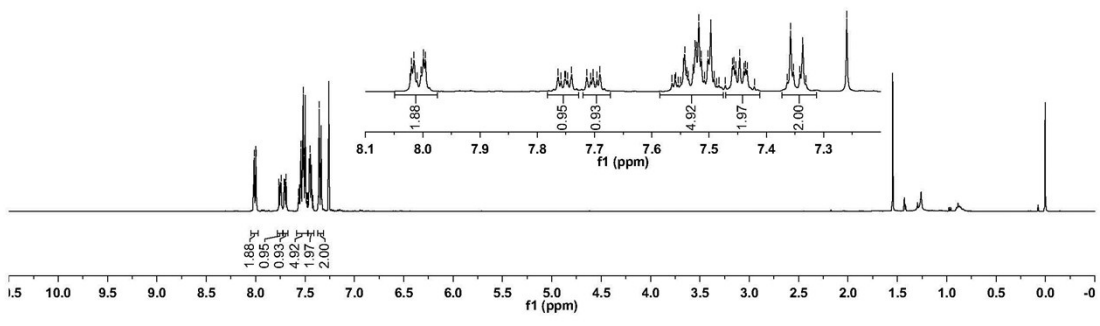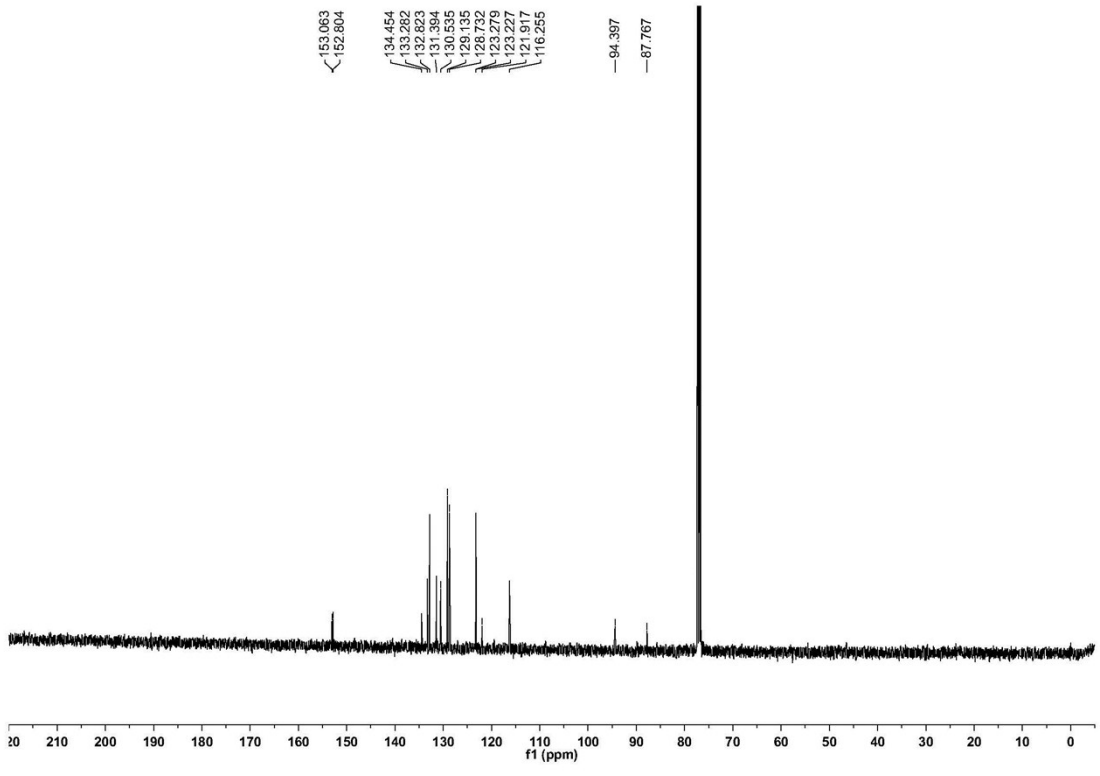

7.990  
7.985  
7.980  
7.973  
7.969  
7.965  
7.890  
7.887  
7.884  
7.872  
7.867  
7.866  
7.862  
7.861  
7.857  
7.854  
7.844  
7.839  
7.838  
7.834  
7.828  
7.824  
7.822  
7.818  
7.815  
7.807  
7.803  
7.800  
7.795  
7.791  
7.785  
7.779  
7.777  
7.774  
7.760  
7.403  
7.399  
7.385  
7.380  
7.372  
7.368  
7.366  
7.362  
7.353  
7.348  
7.334  
7.330  
7.260

2.521  
2.504  
2.486  
1.738  
1.720  
1.684  
1.666  
1.648  
1.111  
1.093  
1.074

7.990  
7.985  
7.973  
7.969  
7.965  
7.890  
7.887  
7.884  
7.872  
7.867  
7.866  
7.862  
7.861  
7.857  
7.854  
7.844  
7.839  
7.838  
7.834  
7.828  
7.824  
7.822  
7.818  
7.815  
7.807  
7.803  
7.800  
7.795  
7.791  
7.785  
7.779  
7.777  
7.774  
7.760  
7.403  
7.399  
7.385  
7.380  
7.372  
7.368  
7.366  
7.362  
7.353  
7.348  
7.334  
7.330  
7.260

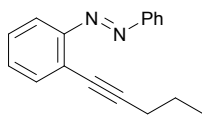

3h

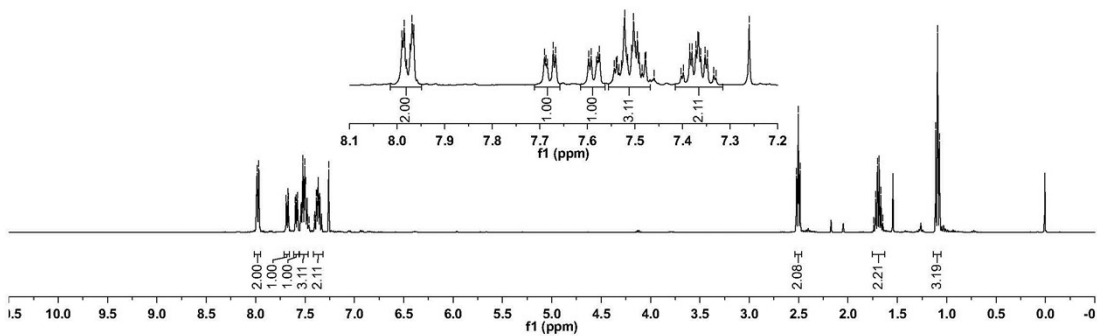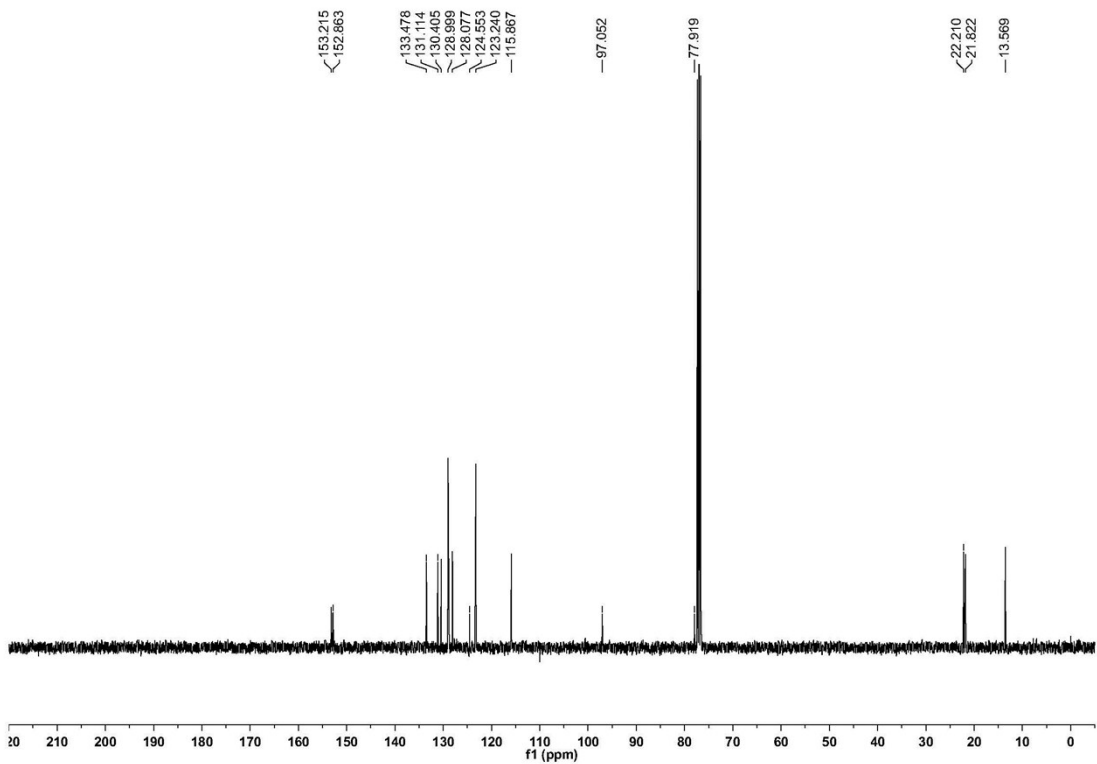

7.825  
7.803  
7.597  
7.591  
7.582  
7.576  
7.572  
7.486  
7.464  
7.406  
7.396  
7.392  
7.383  
7.368  
7.364  
7.354  
7.349  
7.347  
7.333  
7.329  
7.309  
7.304  
7.299  
7.288  
7.269  
7.264  
7.259  
7.247  
7.236  
7.229  
7.214  
7.202  
7.196  
7.191  
7.189  
7.183  
7.180  
7.090  
7.074  
7.070  
7.065  
7.052  
7.047  
6.411

7.825  
7.803  
7.597  
7.591  
7.582  
7.576  
7.572  
7.486  
7.464  
7.406  
7.396  
7.392  
7.383  
7.368  
7.364  
7.354  
7.349  
7.347  
7.333  
7.329  
7.309  
7.304  
7.288  
7.269  
7.264  
7.259  
7.247  
7.236  
7.229  
7.214  
7.202  
7.196  
7.189  
7.183  
7.180  
7.090  
7.074  
7.070  
7.065  
7.052  
7.047

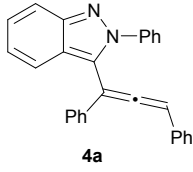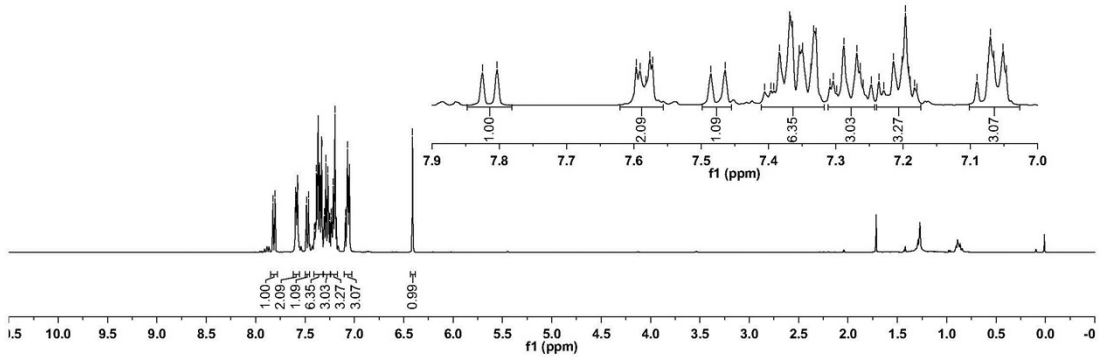

-209.484

148.982  
140.956  
134.484  
132.351  
129.305  
128.960  
128.765  
128.343  
128.717  
127.918  
127.730  
127.248  
126.837  
126.819  
125.524  
122.555  
122.216  
120.610  
102.964  
98.603

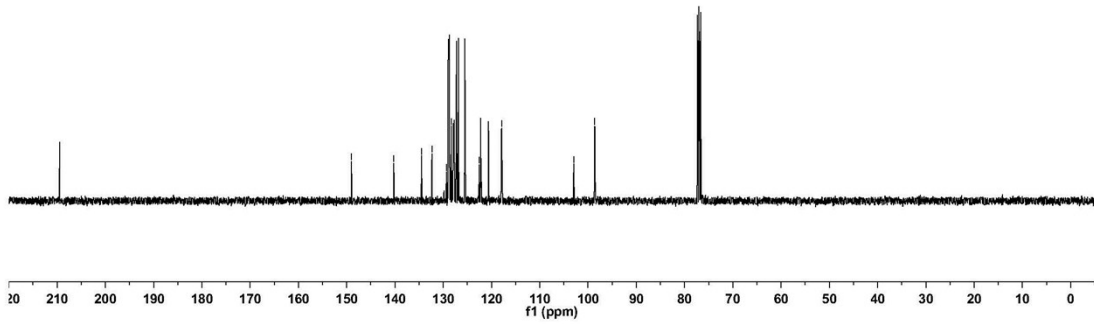



7.758  
7.736  
7.676  
7.673  
7.670  
7.654  
7.652  
7.649  
7.612  
7.608  
7.603  
7.500  
7.484  
7.483  
7.437  
7.430  
7.424  
7.419  
7.413  
7.402  
7.393  
7.388  
7.322  
7.317  
7.312  
7.304  
7.300  
7.296  
7.291  
7.284  
7.279  
7.275  
7.268  
7.262  
7.258  
7.244  
7.223  
7.218  
7.215  
7.207  
7.201  
7.201  
7.189  
7.185  
7.179  
7.172  
7.168  
7.165  
7.044  
7.042  
7.022  
7.006  
7.004  
6.649

7.758  
7.736  
7.673  
7.652  
7.512  
7.508  
7.494  
7.486  
7.480  
7.430  
7.420  
7.413  
7.402  
7.312  
7.317  
7.304  
7.300  
7.296  
7.291  
7.284  
7.279  
7.275  
7.268  
7.262  
7.258  
7.244  
7.201  
7.189  
7.185  
7.168

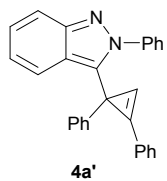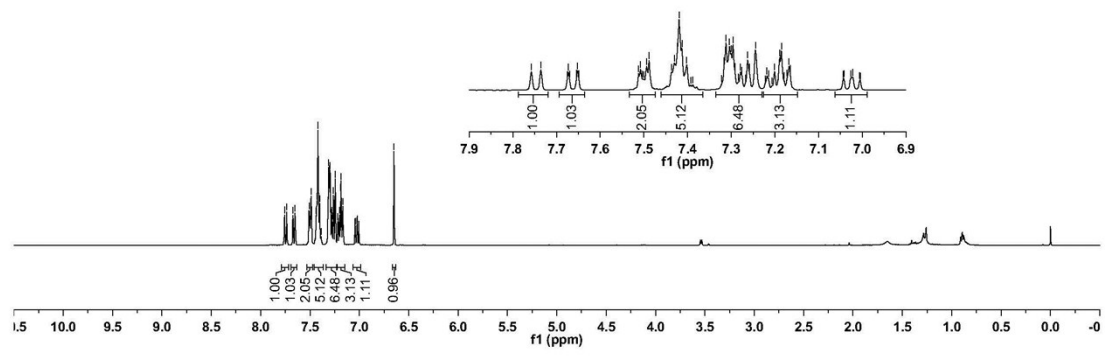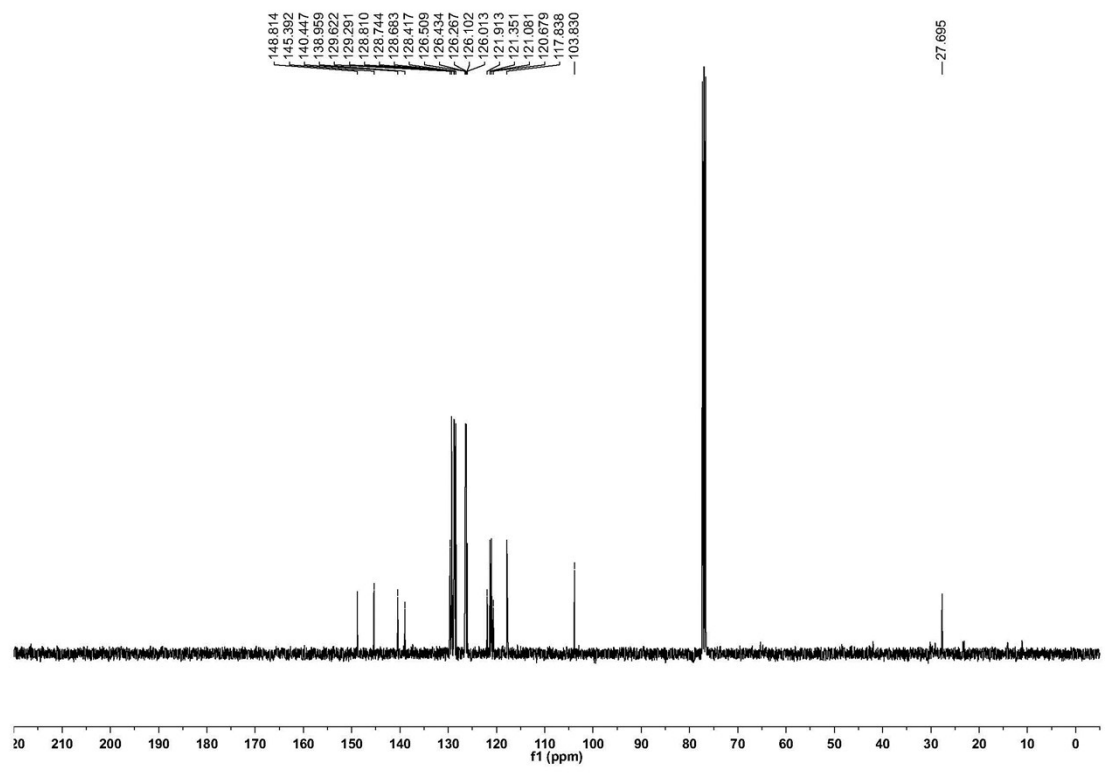

7.813  
7.811  
7.808  
7.791  
7.789  
7.787  
7.588  
7.582  
7.580  
7.578  
7.575  
7.573  
7.568  
7.564  
7.483  
7.480  
7.478  
7.462  
7.459  
7.456  
7.377  
7.377  
7.373  
7.369  
7.365  
7.363  
7.359  
7.355  
7.351  
7.342  
7.342  
7.339  
7.336  
7.334  
7.328  
7.324  
7.322  
7.320  
7.317  
7.311  
7.311  
7.308  
7.304  
7.304  
7.287  
7.283  
7.269  
7.269  
7.266  
7.262  
7.251  
7.251  
7.247  
7.242  
7.242  
7.238  
7.228  
7.225  
7.225  
7.079  
7.076  
7.062  
7.057  
7.055  
7.041  
7.039  
7.029  
7.027  
7.023  
7.007  
7.007  
6.960  
6.955  
6.950  
6.939  
6.935  
6.983  
2.295

7.811  
7.789  
7.588  
7.568  
7.564  
7.480  
7.459  
7.379  
7.377  
7.340  
7.311  
7.311  
7.308  
7.304  
7.304  
7.287  
7.283  
7.269  
7.269  
7.266  
7.262  
7.251  
7.251  
7.247  
7.242  
7.242  
7.238  
7.228  
7.225  
7.225  
7.079  
7.076  
7.062  
7.057  
7.055  
7.041  
7.039  
7.029  
7.027  
7.023  
7.007  
7.007  
6.960  
6.955  
6.950  
6.939  
6.935  
6.983  
2.295

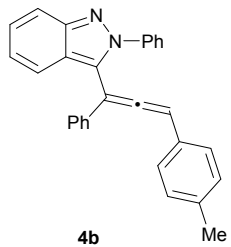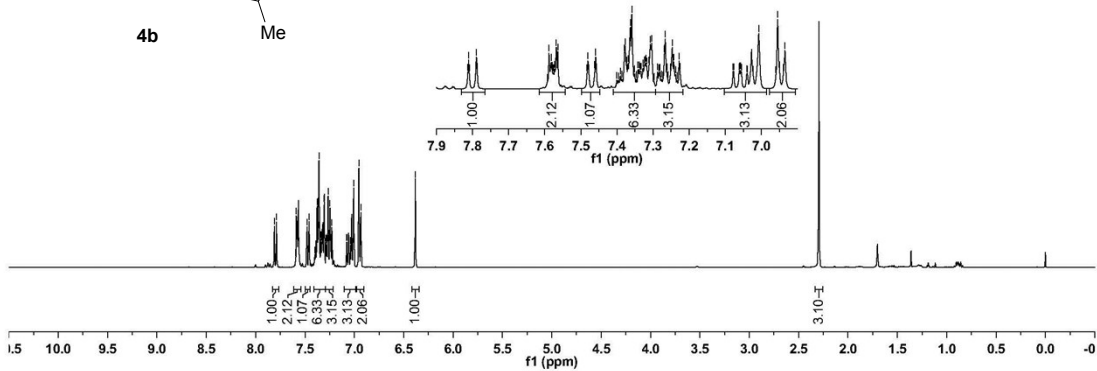

209.400  
148.074  
140.269  
137.704  
134.677  
129.515  
129.449  
129.301  
128.944  
128.727  
128.311  
127.818  
127.171  
126.835  
126.792  
125.520  
122.549  
122.164  
120.653  
117.885  
102.785  
98.452  
21.197

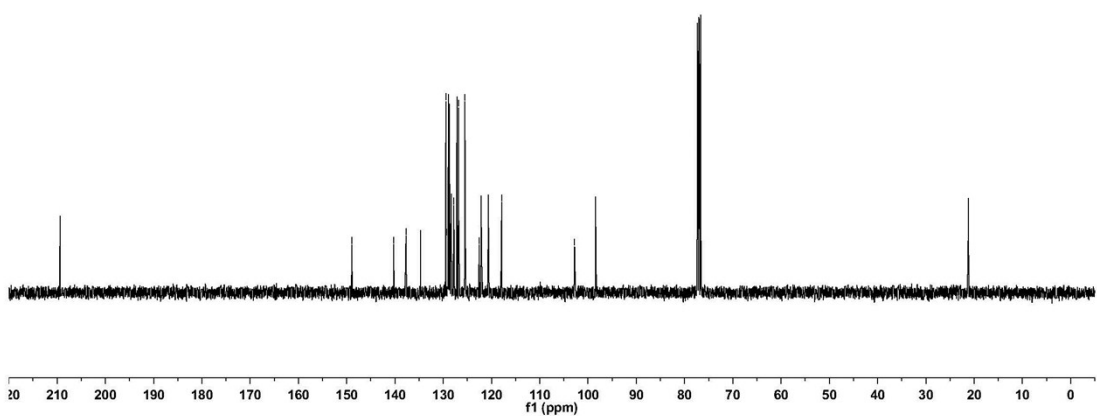

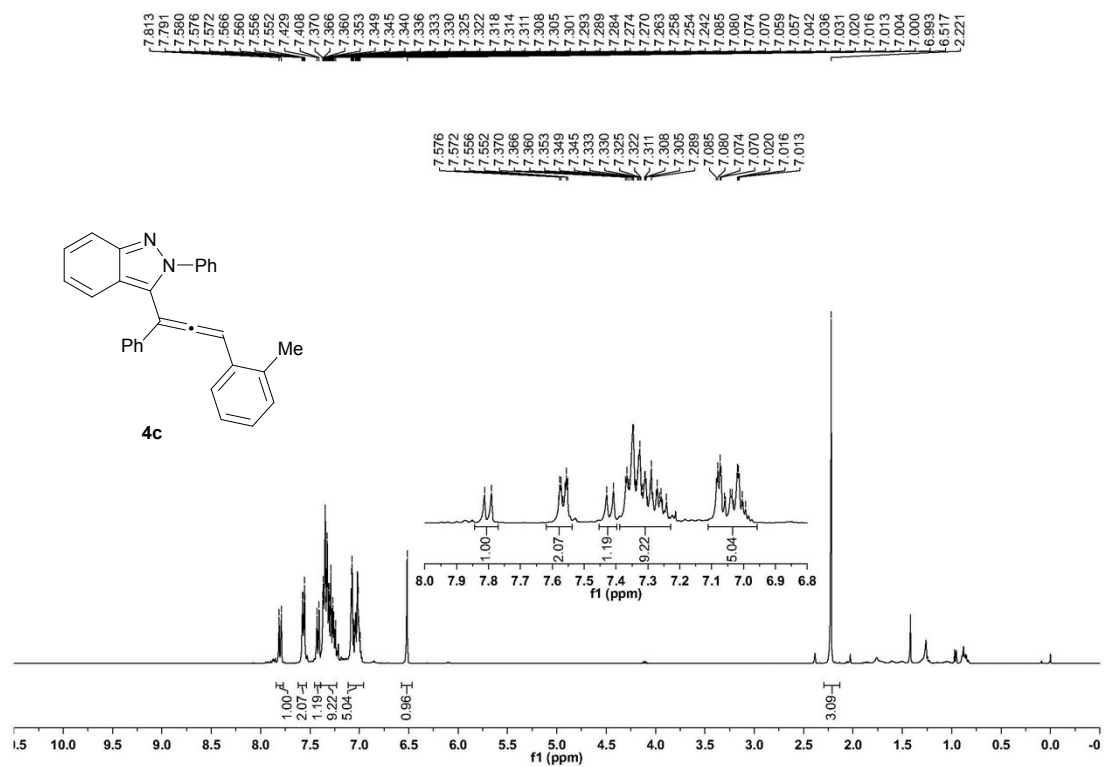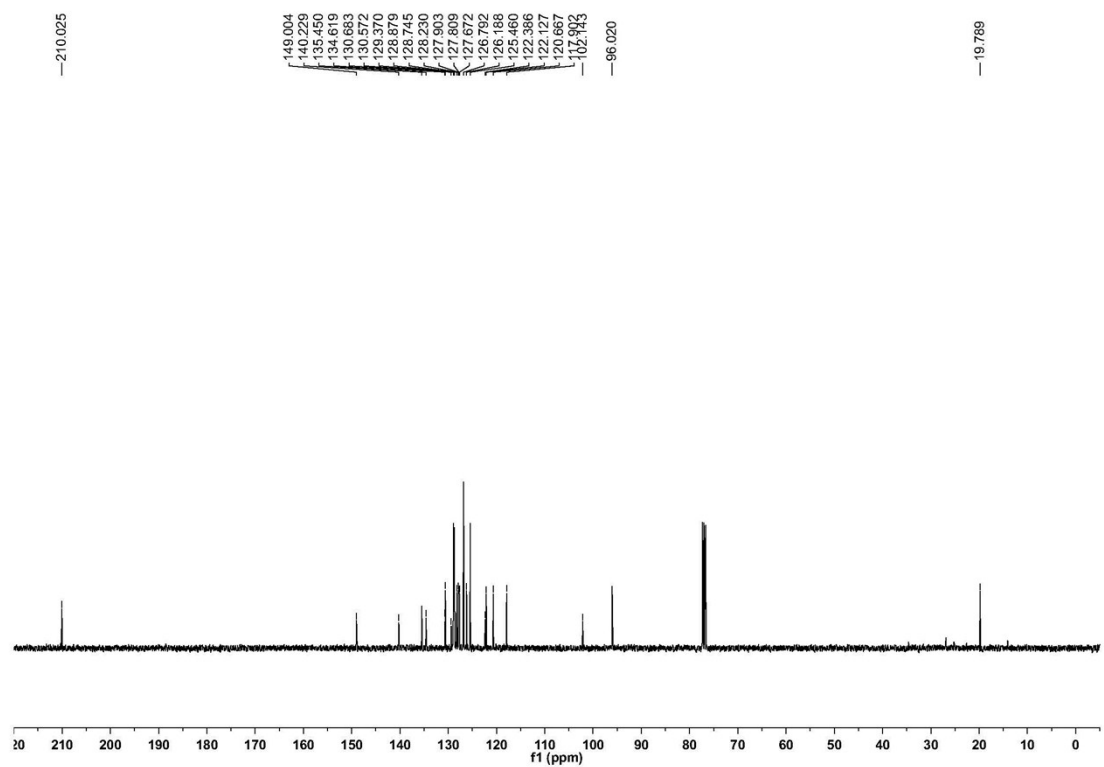

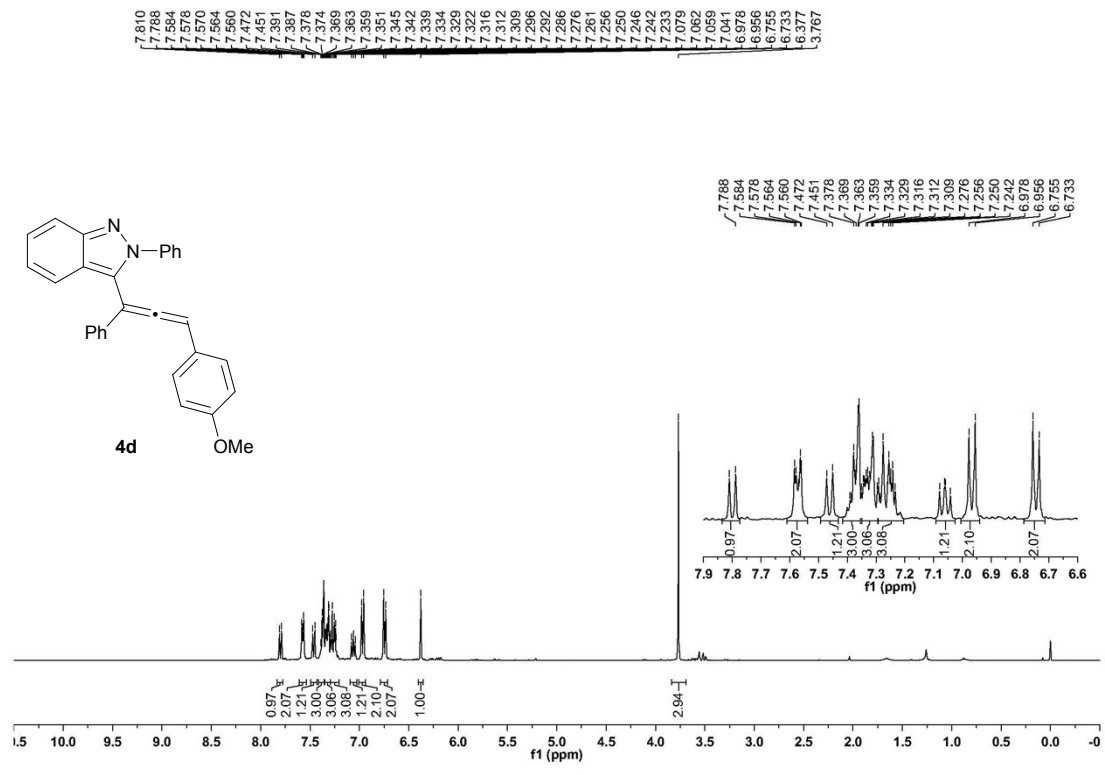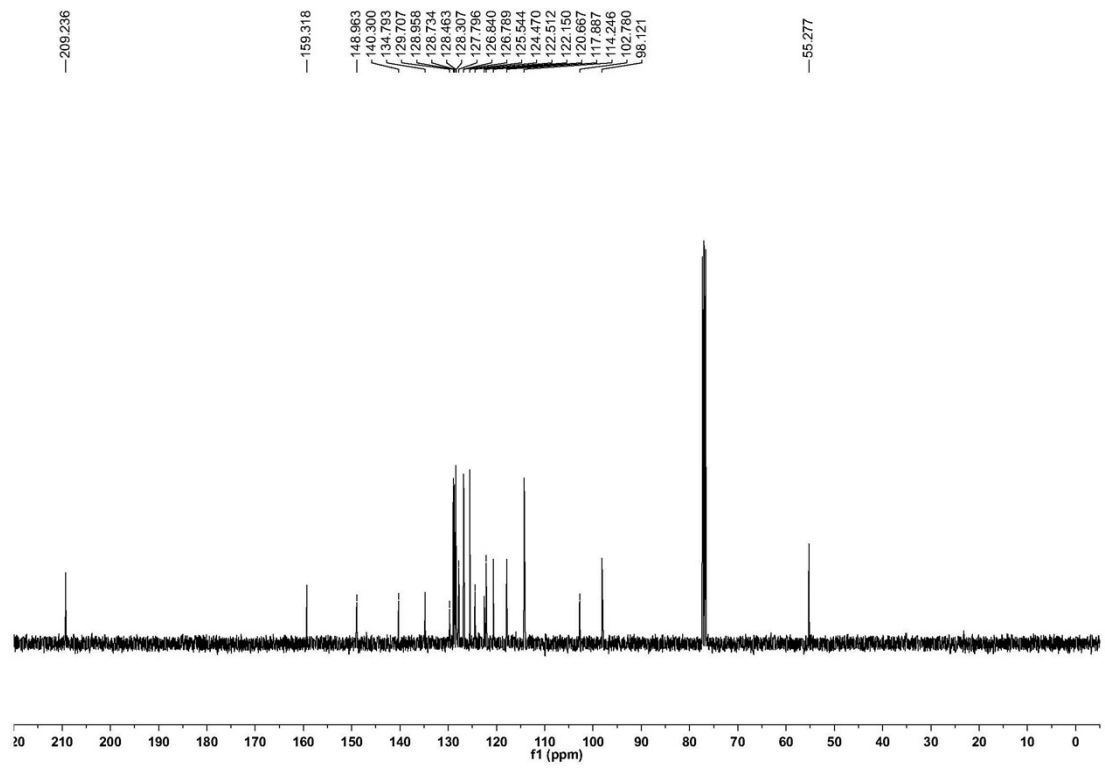

7.887  
7.882  
7.870  
7.866  
7.823  
7.821  
7.818  
7.801  
7.799  
7.797  
7.576  
7.573  
7.571  
7.568  
7.564  
7.555  
7.552  
7.549  
7.545  
7.545  
7.453  
7.437  
7.434  
7.431  
7.397  
7.390  
7.388  
7.385  
7.380  
7.373  
7.370  
7.363  
7.355  
7.353  
7.350  
7.347  
7.346  
7.336  
7.334  
7.331  
7.328  
7.328  
7.324  
7.320  
7.316  
7.314  
7.304  
7.301  
7.296  
7.288  
7.282  
7.277  
7.267  
7.245  
7.096  
7.084  
7.085  
7.085  
7.077  
7.075  
7.073  
7.069  
7.065  
7.059  
7.056  
6.446  
4.384  
4.366  
4.349  
4.331  
1.396  
1.378  
1.360

7.887  
7.886  
7.821  
7.799  
7.564  
7.555  
7.549  
7.455  
7.434  
7.390  
7.388  
7.331  
7.328  
7.385  
7.380  
7.373  
7.316  
7.314  
7.304  
7.301  
7.328  
7.324  
7.316  
7.288  
7.282  
7.304  
7.301  
7.288  
7.085  
7.085  
7.065

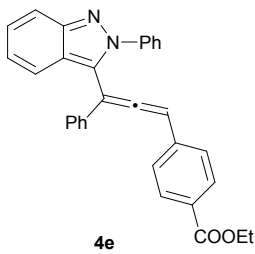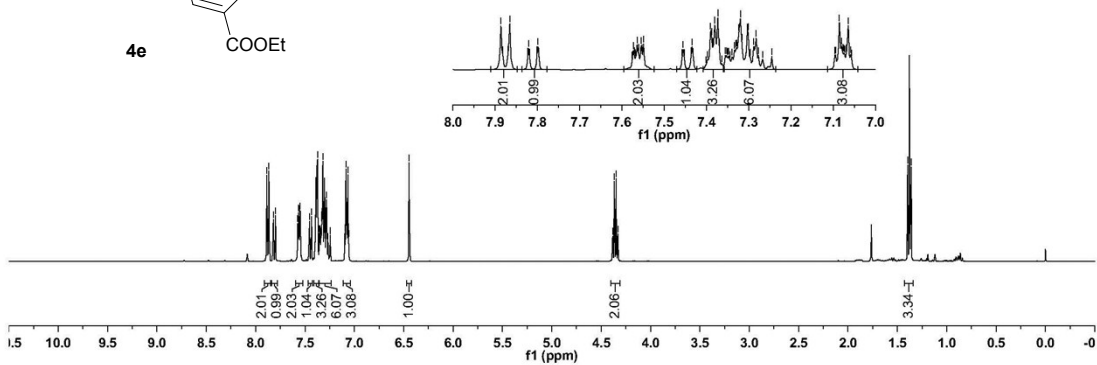

166.131  
149.004  
140.137  
137.197  
133.946  
129.950  
129.538  
129.044  
128.872  
128.719  
128.518  
128.198  
127.031  
126.880  
125.517  
122.587  
120.446  
103.368  
98.097  
60.945  
14.275

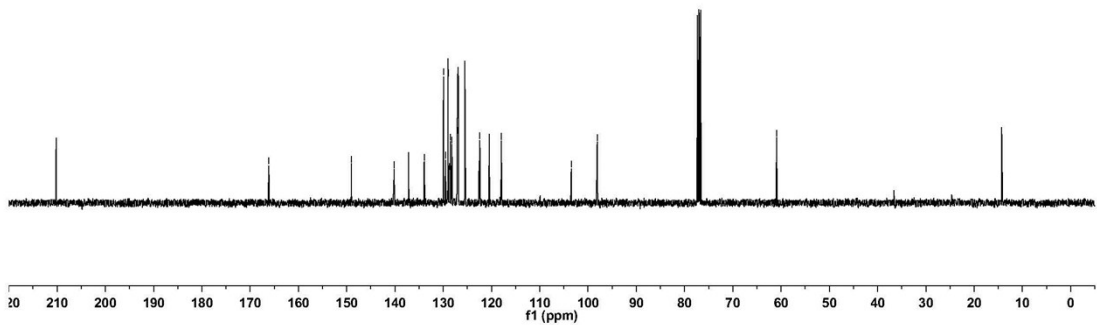

8.049  
8.027  
7.829  
7.807  
7.564  
7.558  
7.551  
7.548  
7.545  
7.542  
7.539  
7.428  
7.426  
7.423  
7.418  
7.412  
7.406  
7.404  
7.402  
7.395  
7.393  
7.390  
7.376  
7.373  
7.371  
7.368  
7.365  
7.357  
7.351  
7.349  
7.342  
7.342  
7.335  
7.334  
7.260  
7.118  
7.116  
7.108  
7.102  
7.099  
7.097  
7.094  
7.090  
7.086  
7.080  
7.078  
6.460

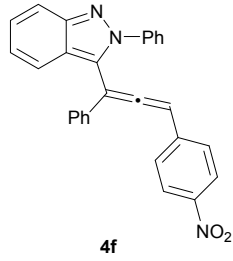

8.049  
8.027  
7.829  
7.807  
7.564  
7.558  
7.551  
7.548  
7.542  
7.539  
7.428  
7.426  
7.412  
7.406  
7.404  
7.402  
7.393  
7.368  
7.365  
7.357  
7.351  
7.349  
7.342  
7.339  
7.260  
7.108  
7.102  
7.089  
7.086  
7.086

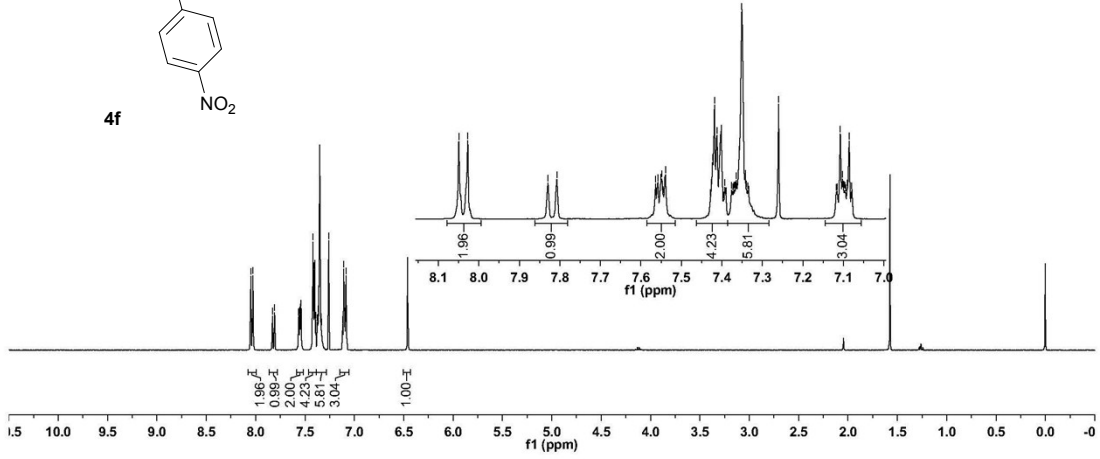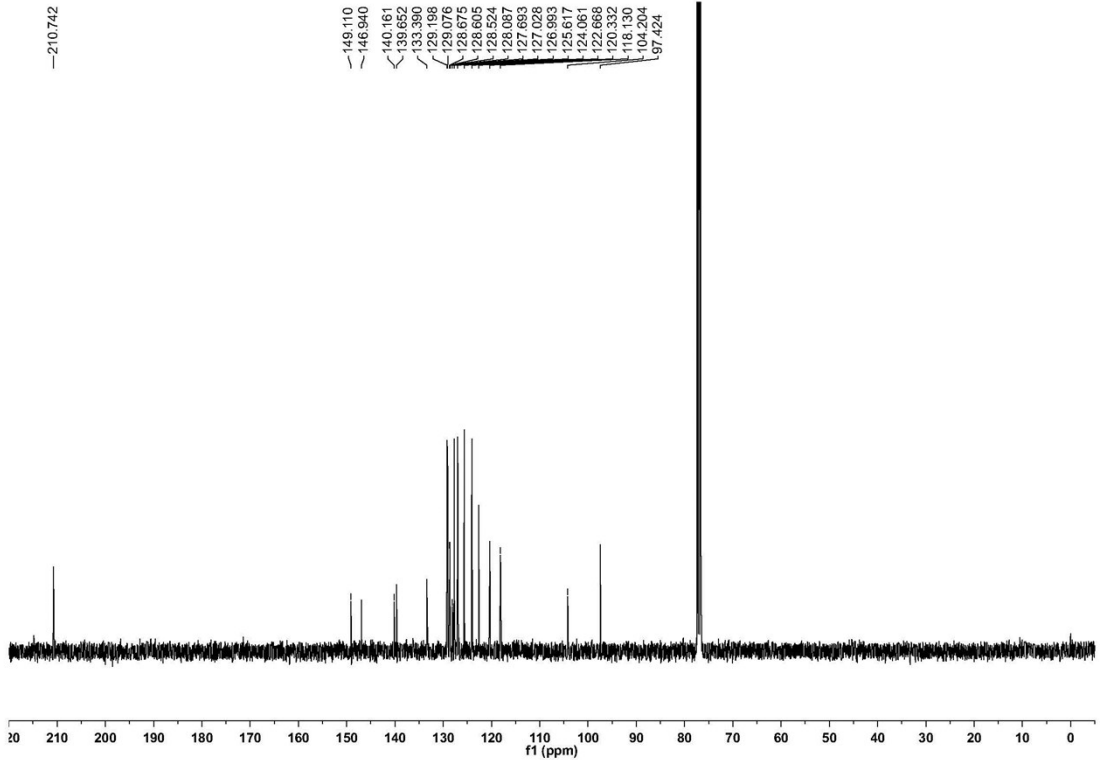

7.881  
7.859  
7.816  
7.812  
7.803  
7.799  
7.793  
7.770  
7.763  
7.759  
7.747  
7.694  
7.693  
7.665  
7.657  
7.652  
7.646  
7.641  
7.637  
7.577  
7.573  
7.567  
7.564  
7.549  
7.546  
7.543  
7.503  
7.491  
7.487  
7.476  
7.468  
7.457  
7.448  
7.442  
7.439  
7.434  
7.430  
7.427  
7.421  
7.413  
7.409  
7.404  
7.388  
7.385  
7.370  
7.365  
7.360  
7.346  
7.344  
7.342  
7.335  
7.330  
7.325  
7.321  
7.316  
7.309  
7.283  
7.193  
7.189  
7.172  
7.168  
7.151  
7.135  
7.130  
7.113  
6.630

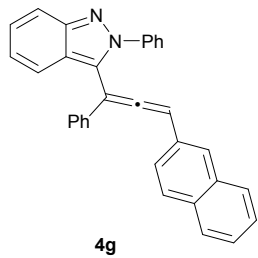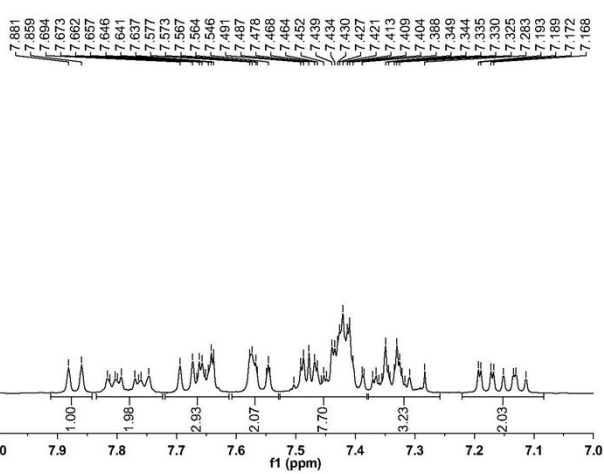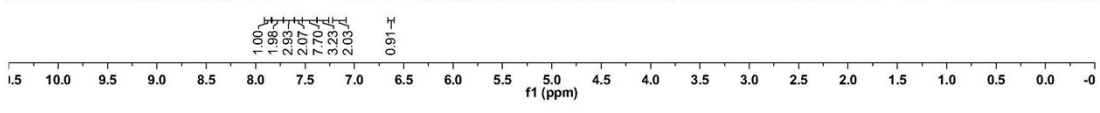

-210.073  
149.011  
140.268  
134.486  
132.480  
132.880  
129.866  
129.314  
129.005  
128.811  
128.438  
127.984  
127.763  
127.669  
126.886  
126.494  
126.329  
126.073  
125.865  
124.685  
122.576  
122.275  
121.940  
117.840  
103.186  
-98.977

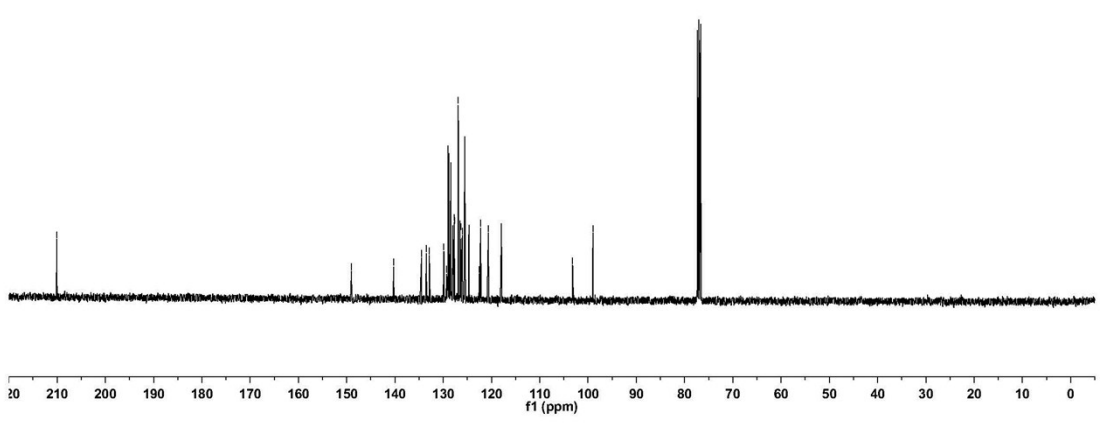

7.814  
7.814  
7.809  
7.792  
7.789  
7.787  
7.620  
7.616  
7.611  
7.602  
7.598  
7.596  
7.531  
7.525  
7.510  
7.507  
7.504  
7.496  
7.491  
7.387  
7.384  
7.356  
7.351  
7.348  
7.345  
7.342  
7.340  
7.336  
7.333  
7.328  
7.326  
7.318  
7.277  
7.274  
7.271  
7.267  
7.264  
7.258  
7.256  
7.252  
7.246  
7.243  
7.232  
7.228  
7.226  
7.222  
7.212  
7.204  
7.180  
7.178  
7.176  
7.167  
7.165  
7.163  
7.101  
7.089  
7.082  
7.079  
7.077  
7.063  
7.061  
6.932  
6.923  
6.919  
6.910  
6.851  
6.848  
6.842  
6.840  
6.638  
6.672

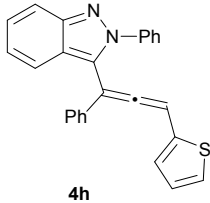

7.811  
7.789  
7.7620  
7.7616  
7.602  
7.588  
7.586  
7.528  
7.528  
7.507  
7.504  
7.371  
7.367  
7.364  
7.351  
7.348  
7.345  
7.342  
7.340  
7.336  
7.333  
7.328  
7.326  
7.318  
7.277  
7.274  
7.271  
7.267  
7.264  
7.258  
7.256  
7.252  
7.246  
7.243  
7.232  
7.228  
7.226  
7.222  
7.212  
7.204  
7.180  
7.178  
7.176  
7.167  
7.165  
7.163  
7.101  
7.089  
7.082  
7.079  
7.077  
7.063  
7.061  
6.932  
6.923  
6.919  
6.910  
6.851  
6.848  
6.842  
6.840

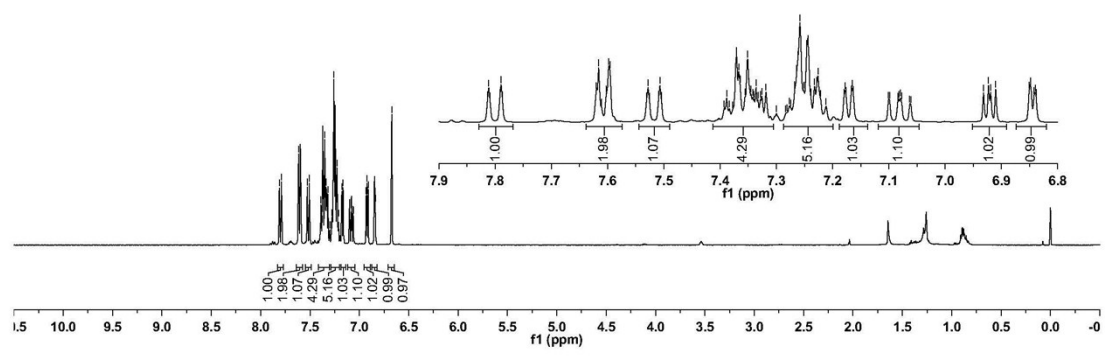

-209.288  
148.973  
140.223  
136.033  
134.437  
129.016  
128.924  
128.688  
128.301  
128.042  
127.590  
126.884  
126.273  
125.915  
122.702  
122.284  
120.626  
117.882  
103.278  
-92.807

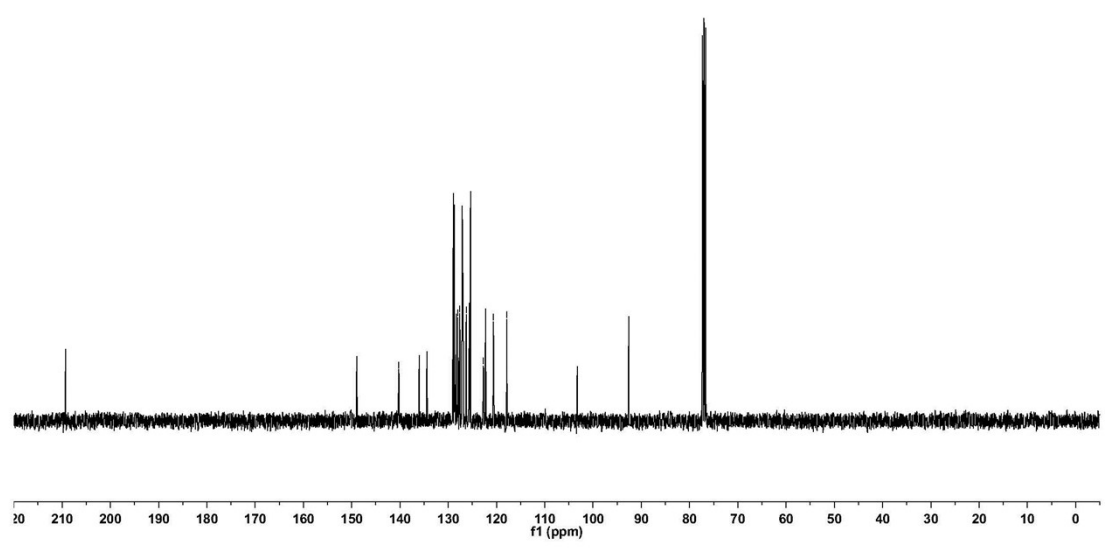



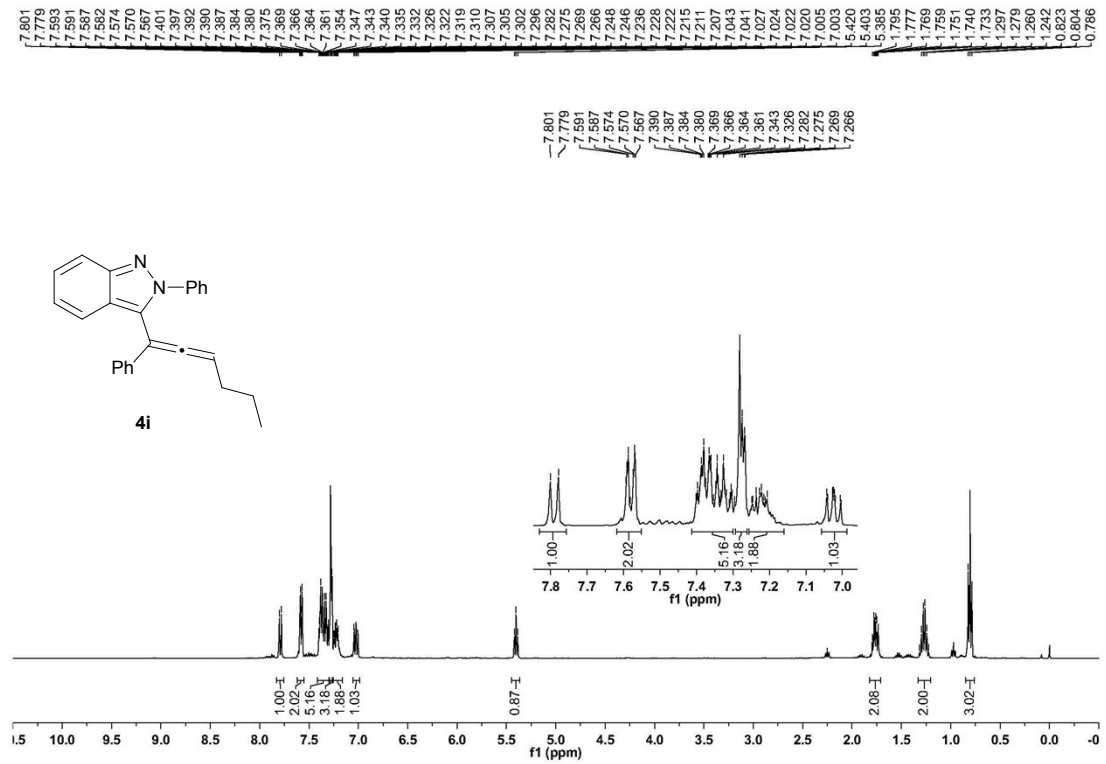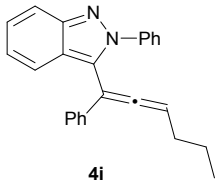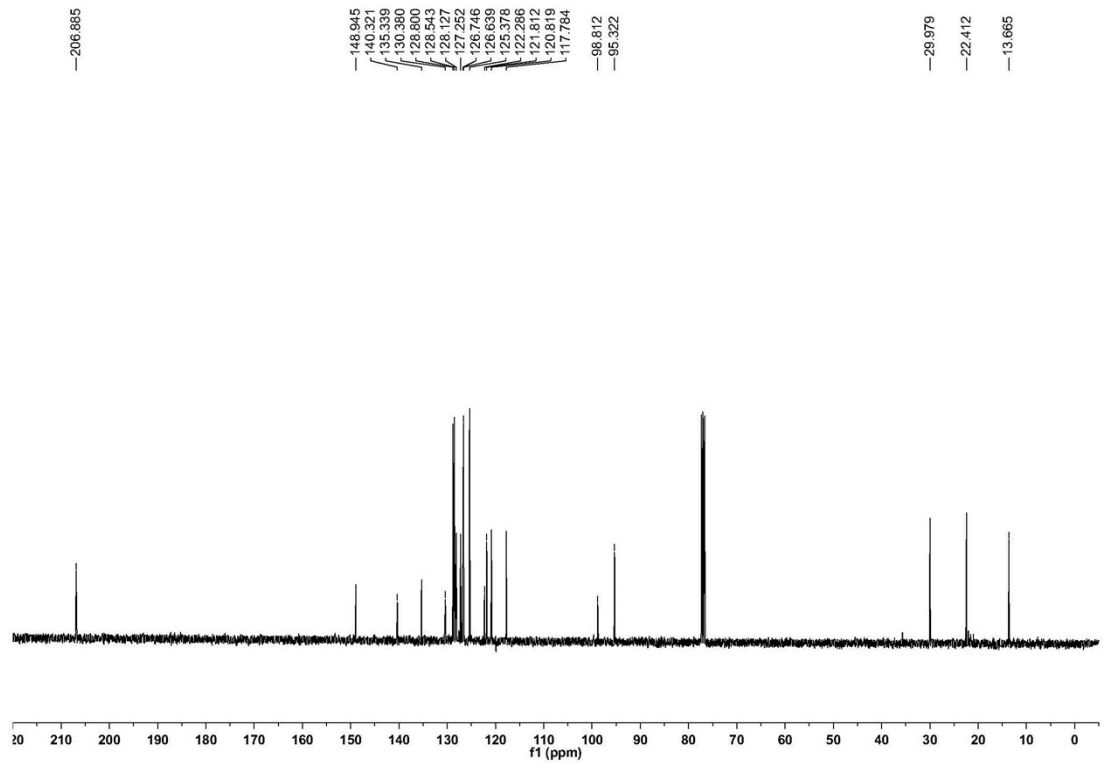

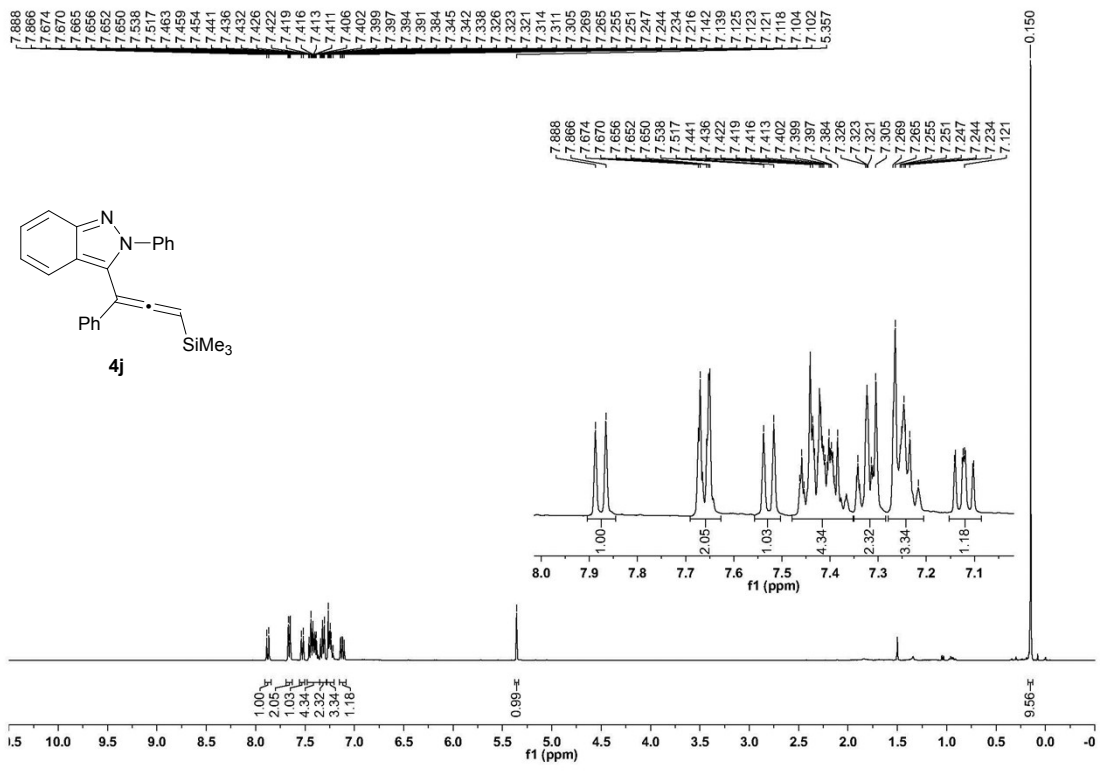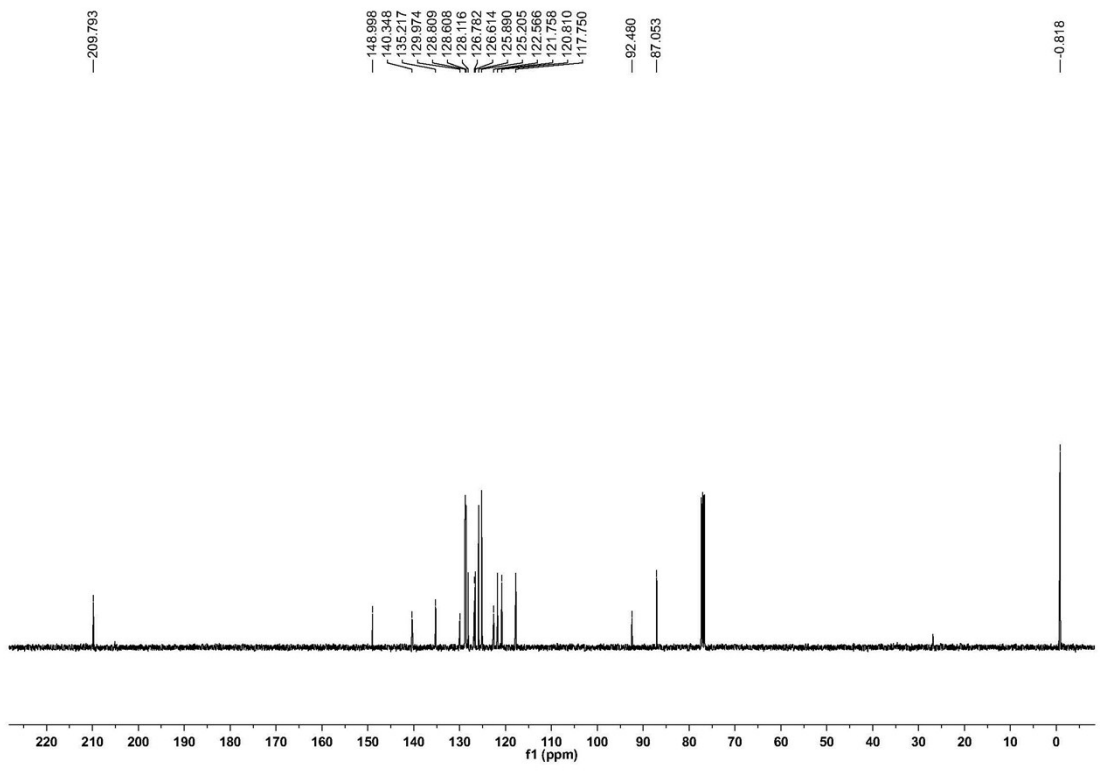

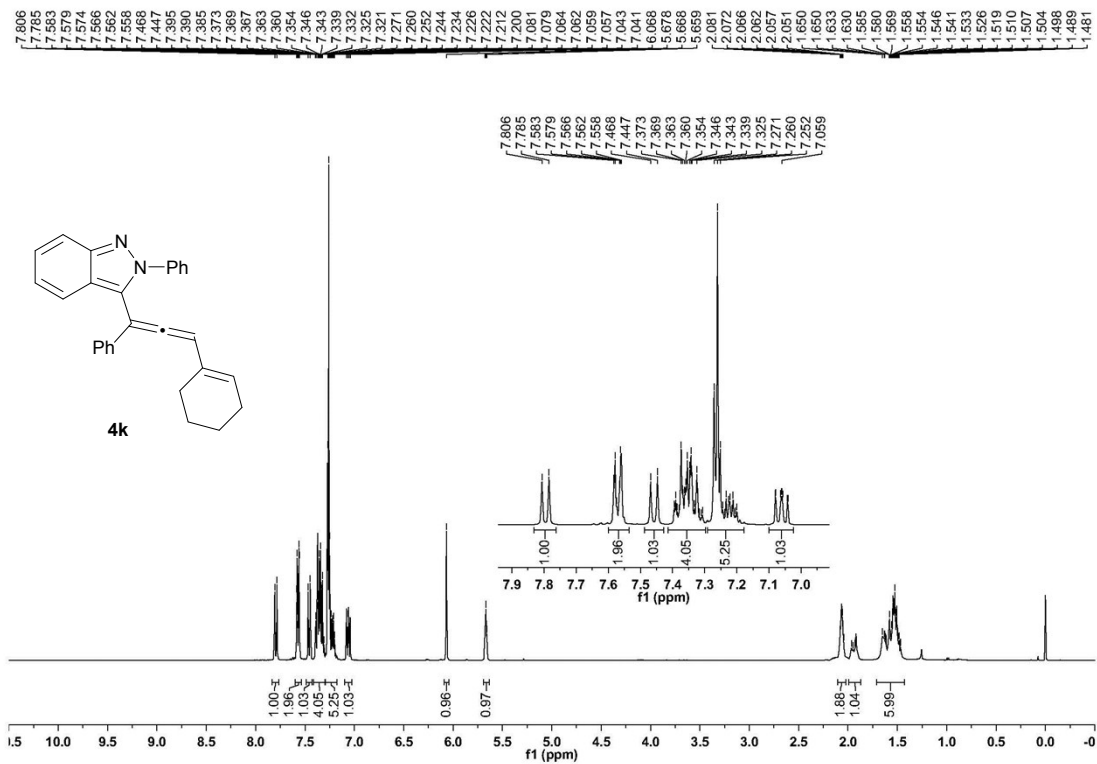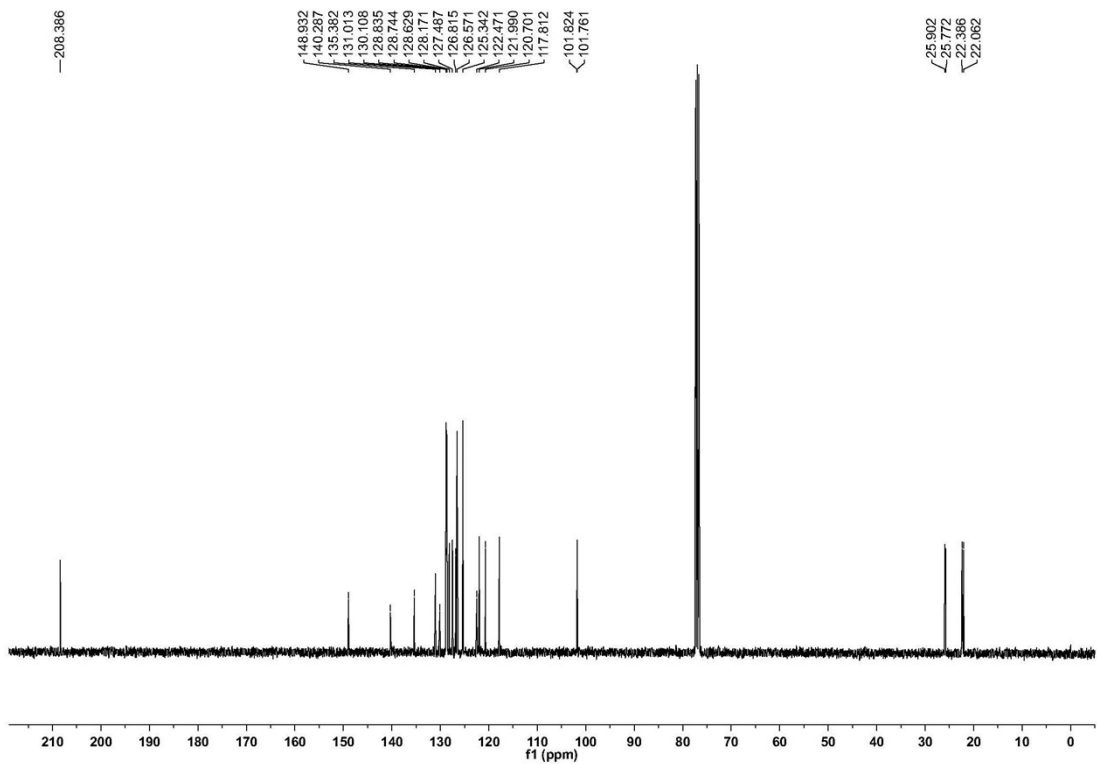

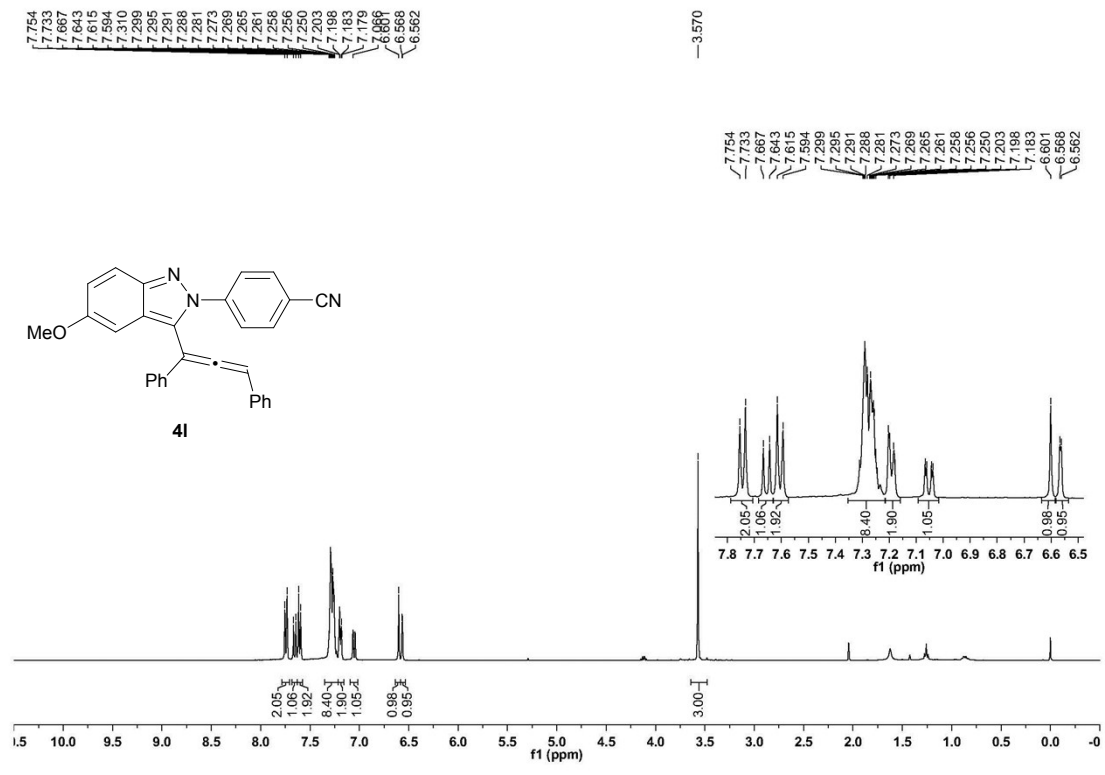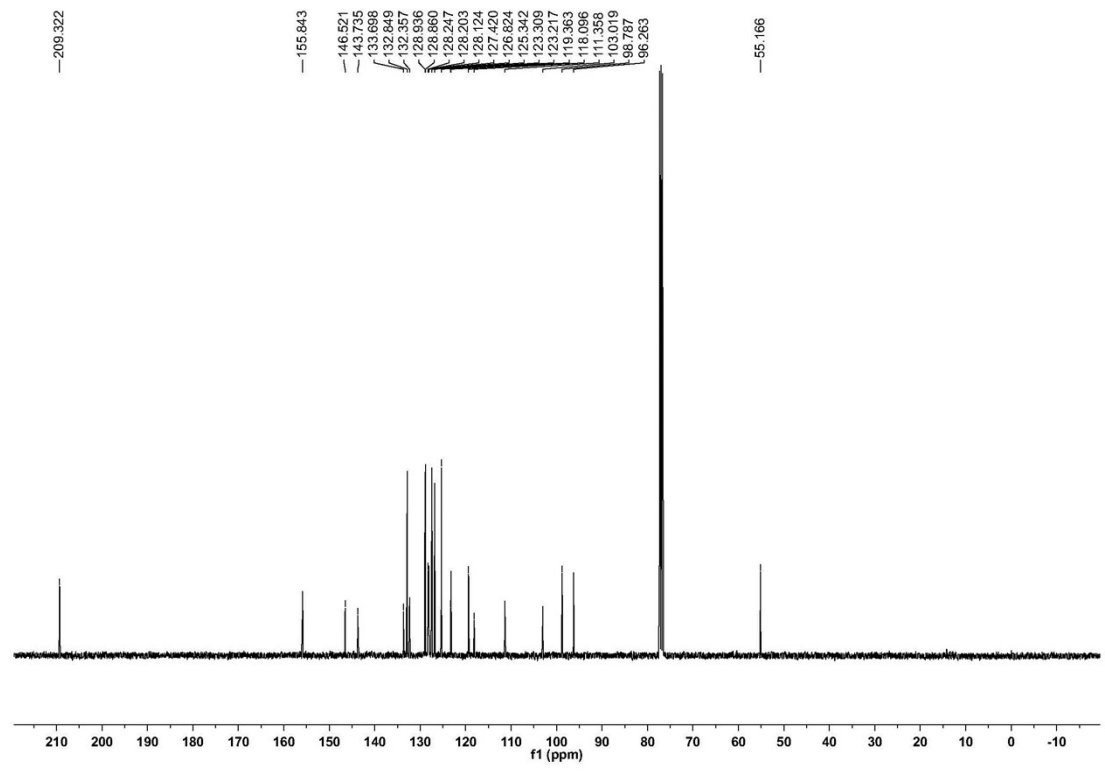

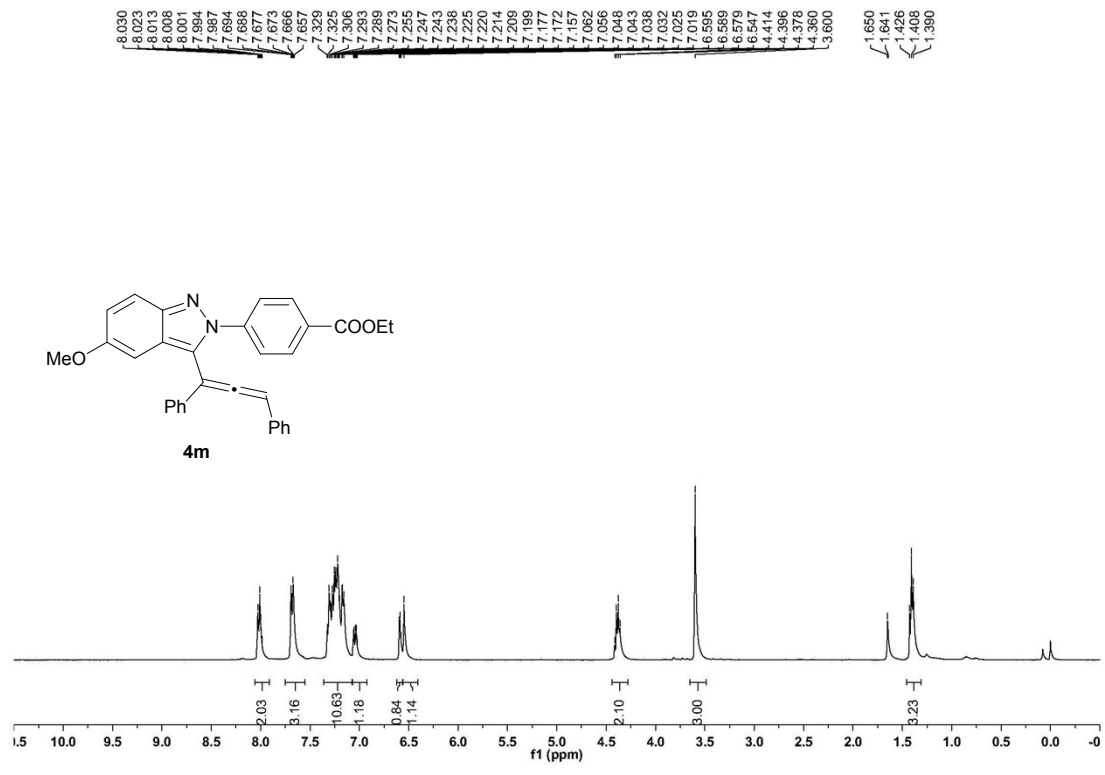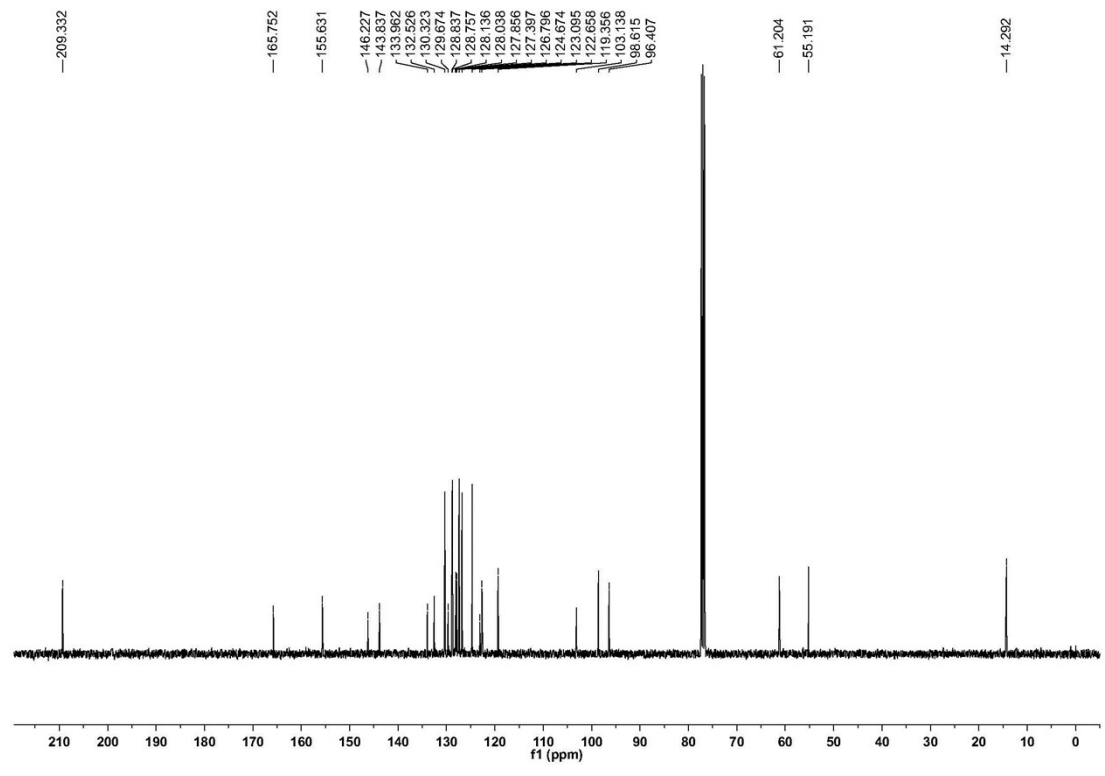

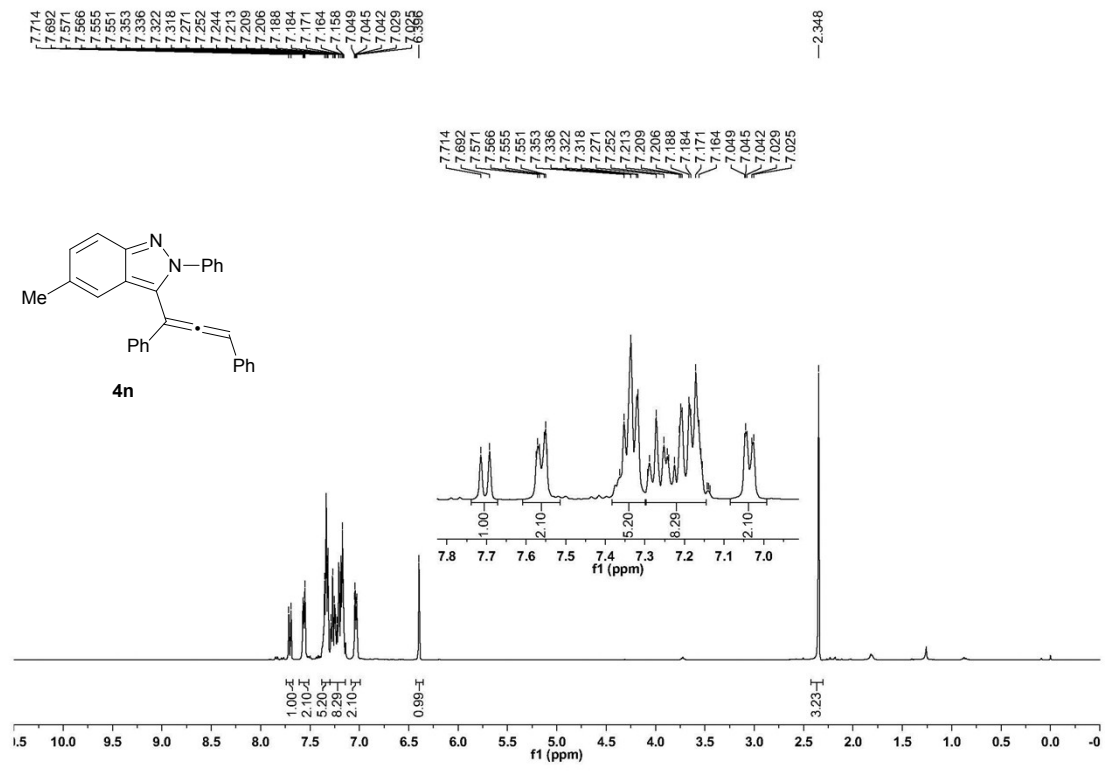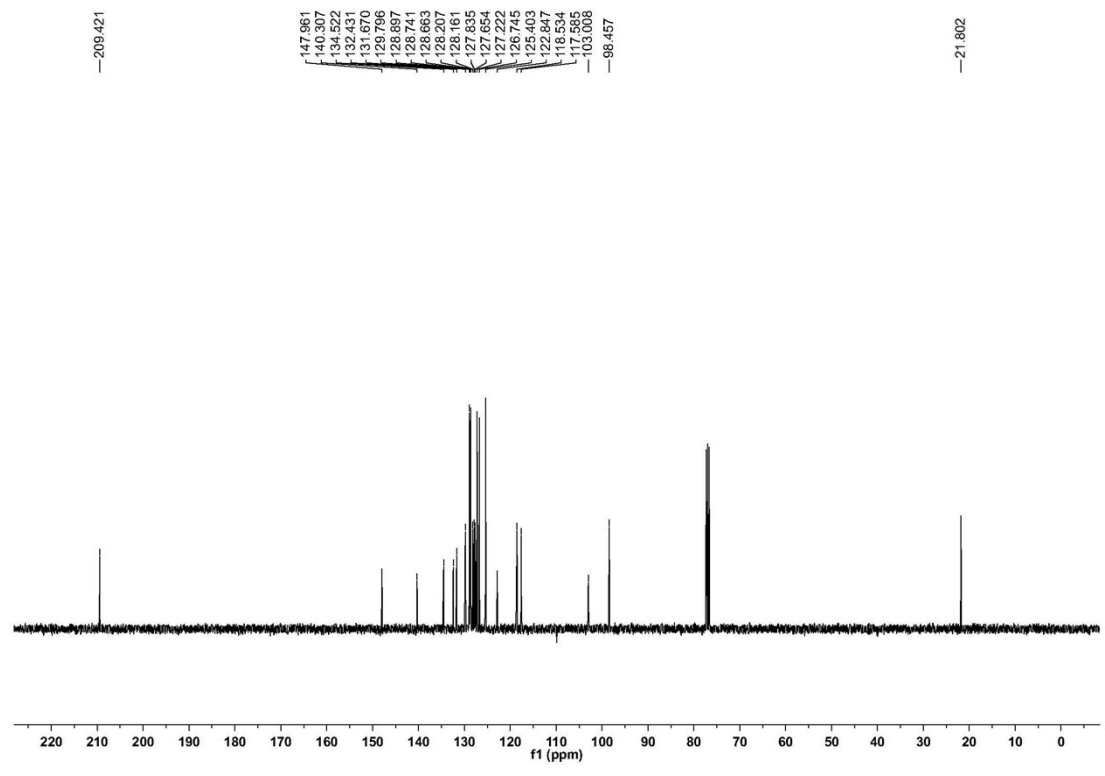

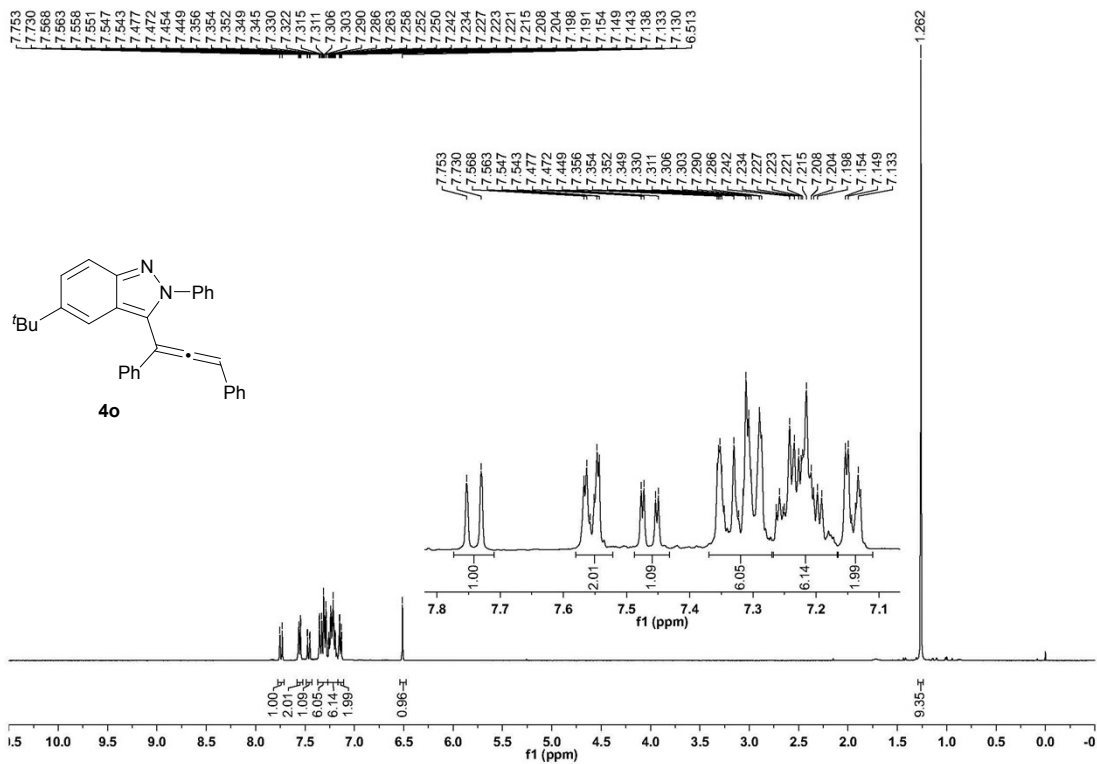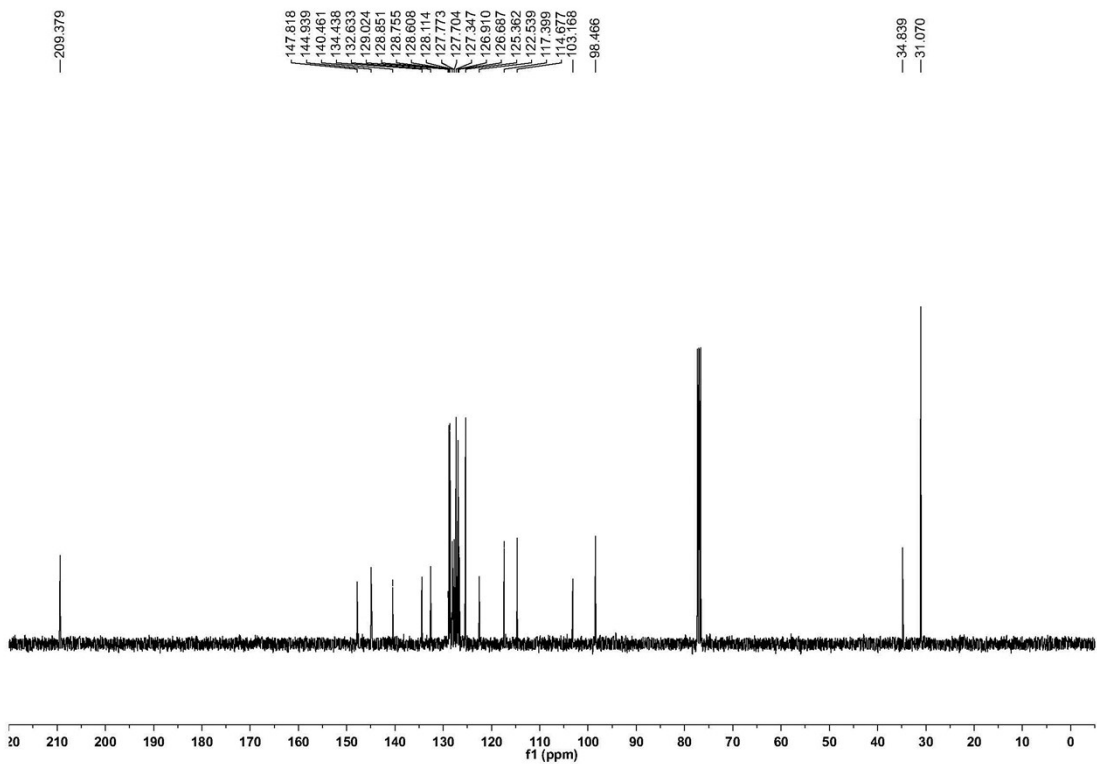

7.790  
7.778  
7.766  
7.755  
7.570  
7.563  
7.558  
7.550  
7.545  
7.397  
7.388  
7.375  
7.361  
7.348  
7.346  
7.330  
7.325  
7.306  
7.288  
7.271  
7.267  
7.261  
7.246  
7.234  
7.231  
7.224  
7.210  
7.195  
7.191  
7.167  
7.163  
7.158  
7.144  
7.141  
7.135  
7.117  
7.112  
7.056  
7.050  
7.040  
7.035  
7.032  
7.016  
7.011  
6.397

7.790  
7.778  
7.766  
7.755  
7.570  
7.563  
7.558  
7.550  
7.545  
7.397  
7.388  
7.375  
7.361  
7.348  
7.346  
7.330  
7.325  
7.306  
7.288  
7.271  
7.267  
7.261  
7.255  
7.246  
7.234  
7.231  
7.224  
7.210  
7.195  
7.191  
7.167  
7.163  
7.158  
7.144  
7.141  
7.135  
7.117  
7.112  
7.056  
7.050  
7.040  
7.035  
7.032  
7.016  
7.011

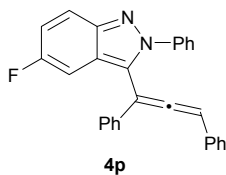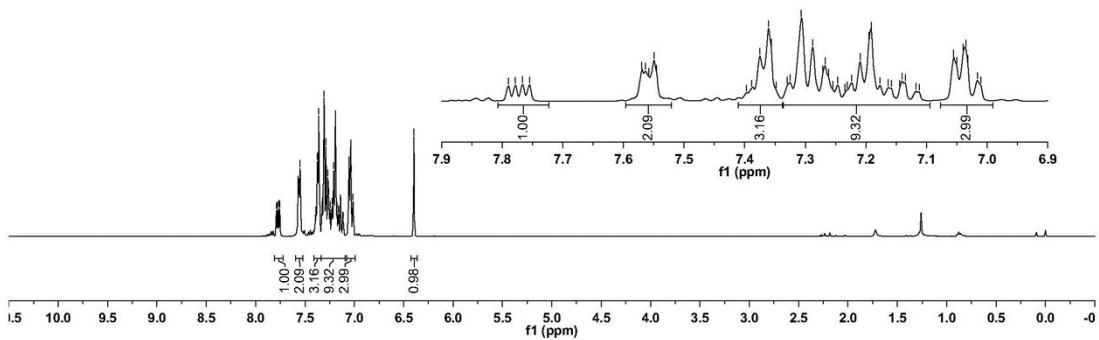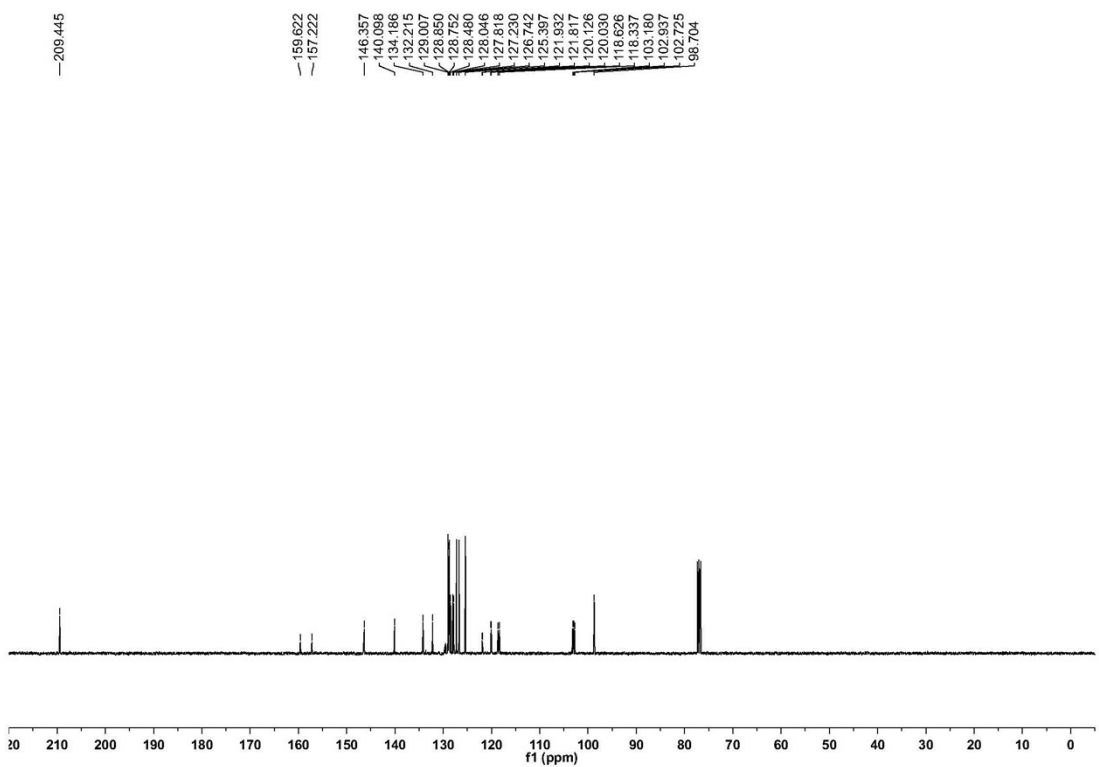



7.746  
7.726  
7.663  
7.559  
7.549  
7.544  
7.450  
7.387  
7.376  
7.364  
7.358  
7.301  
7.292  
7.287  
7.279  
7.275  
7.268  
7.258  
7.252  
7.200  
7.191  
7.176  
7.1045  
7.039  
7.026  
6.414

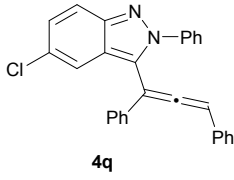

7.746  
7.723  
7.568  
7.559  
7.549  
7.544  
7.450  
7.387  
7.376  
7.364  
7.358  
7.301  
7.287  
7.279  
7.275  
7.268  
7.258  
7.252  
7.200  
7.191  
7.176  
7.1045  
7.039  
7.026

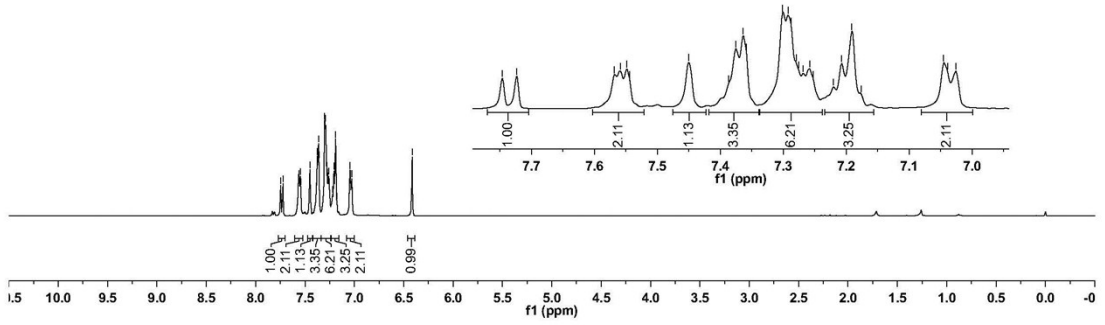

209.482

147.266  
136.946  
134.126  
132.096  
128.160  
128.029  
128.887  
128.755  
128.572  
128.273  
128.093  
127.858  
127.829  
127.240  
126.673  
125.378  
122.890  
118.527  
117.533  
102.543  
98.835

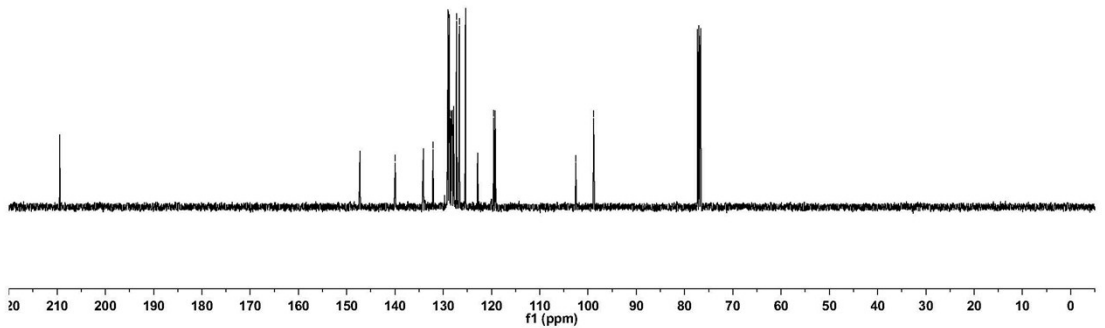

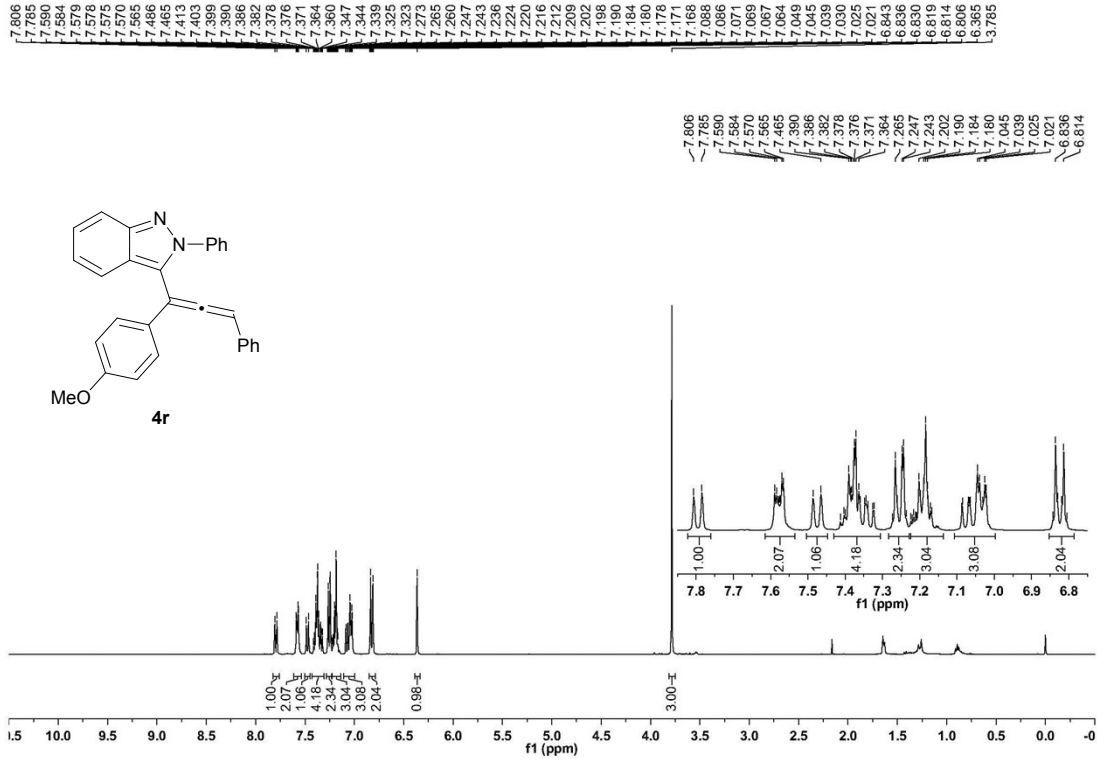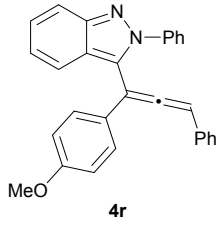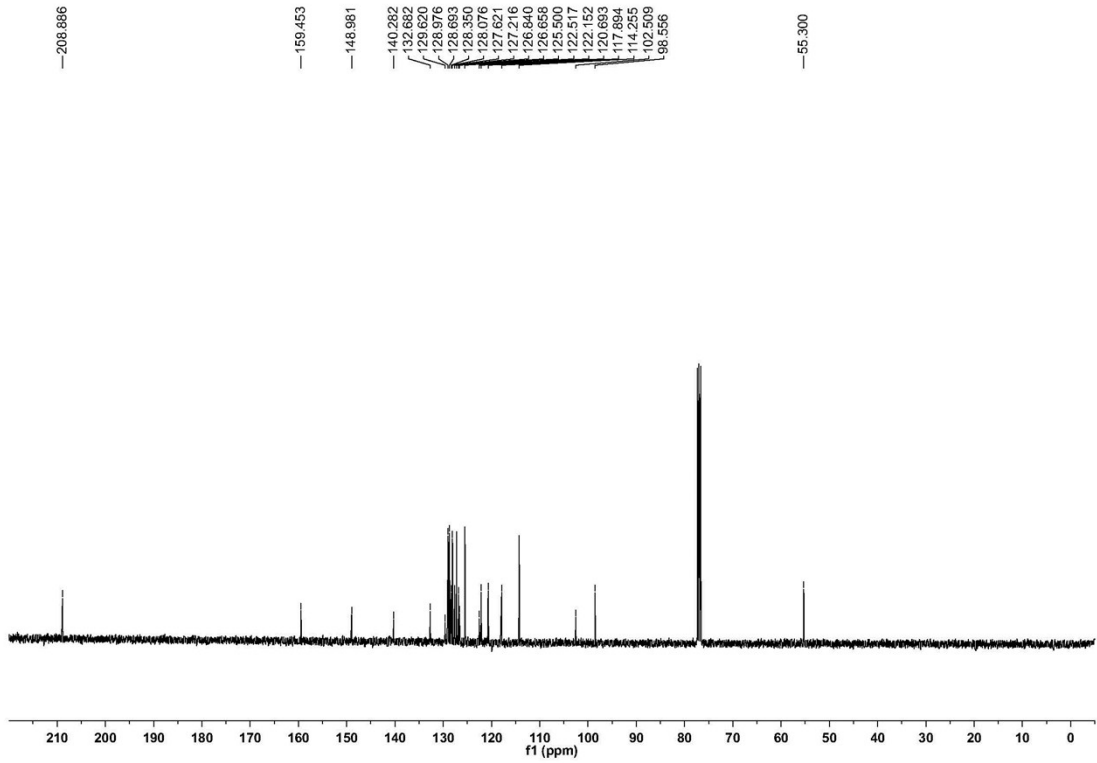

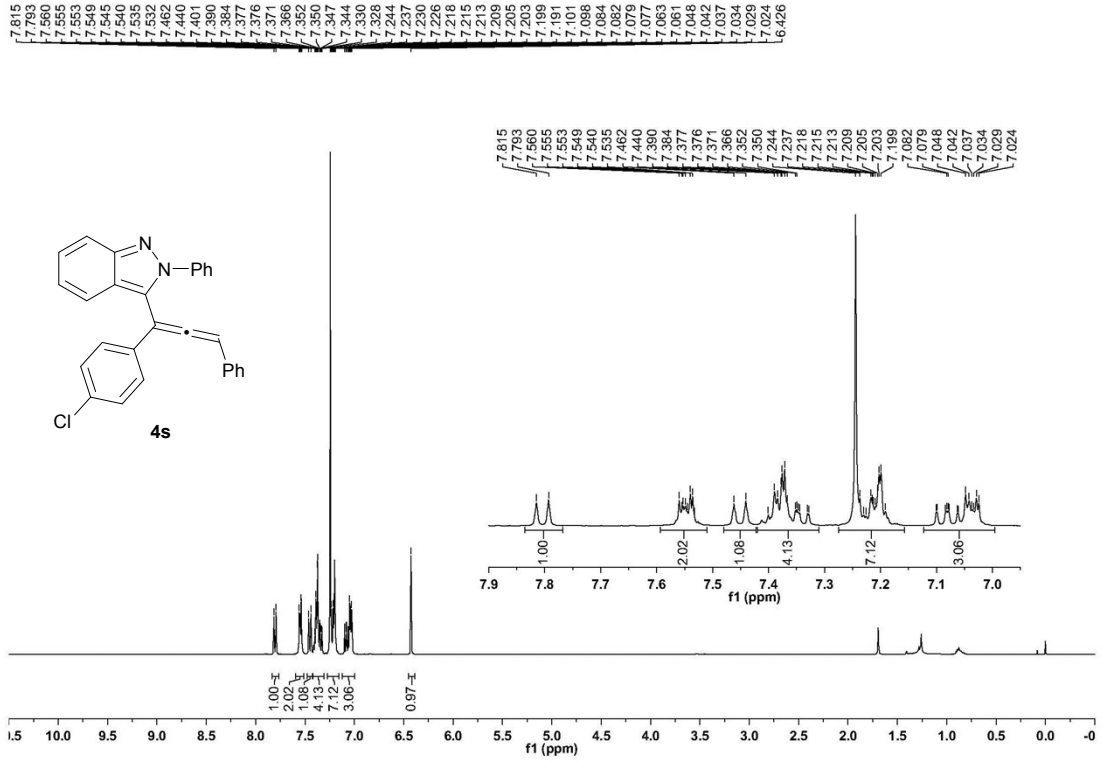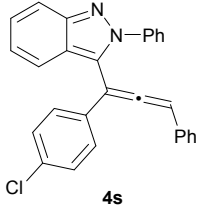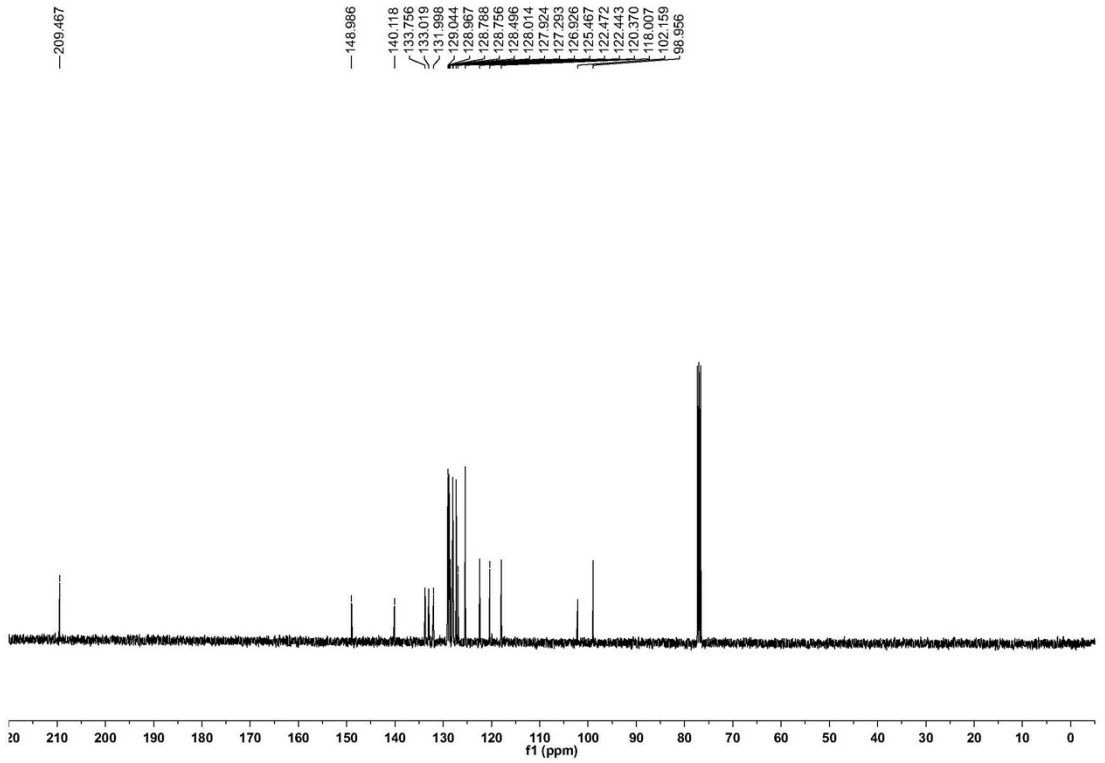

9.067  
9.046  
7.934  
7.930  
7.927  
7.925  
7.913  
7.909  
7.906  
7.903  
7.767  
7.764  
7.749  
7.745  
7.741  
7.726  
7.725  
7.544  
7.537  
7.532  
7.524  
7.519  
7.510  
7.507  
7.504  
7.486  
7.486  
7.483  
7.468  
7.465  
7.442  
7.439  
7.432  
7.414  
7.403  
7.400  
7.238  
7.226  
7.222  
7.218  
7.205  
7.201  
7.190  
7.186  
7.163  
7.159  
7.155  
7.141  
7.099  
7.090  
6.906  
6.898  
6.884  
6.881  
6.877  
6.862  
6.860  
6.522  
6.501  
4.334

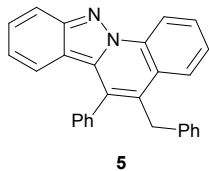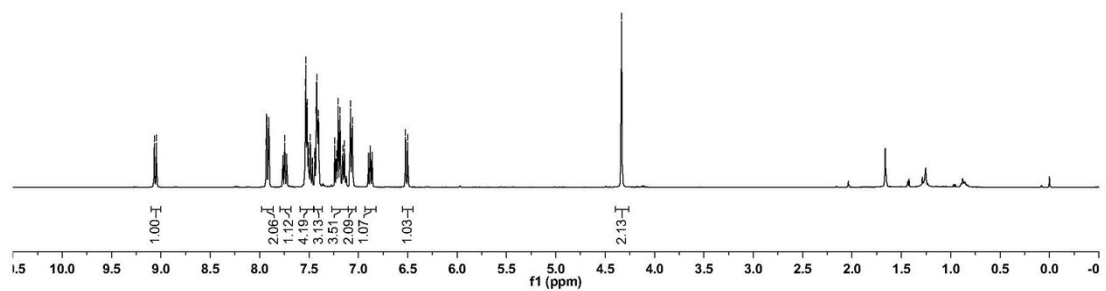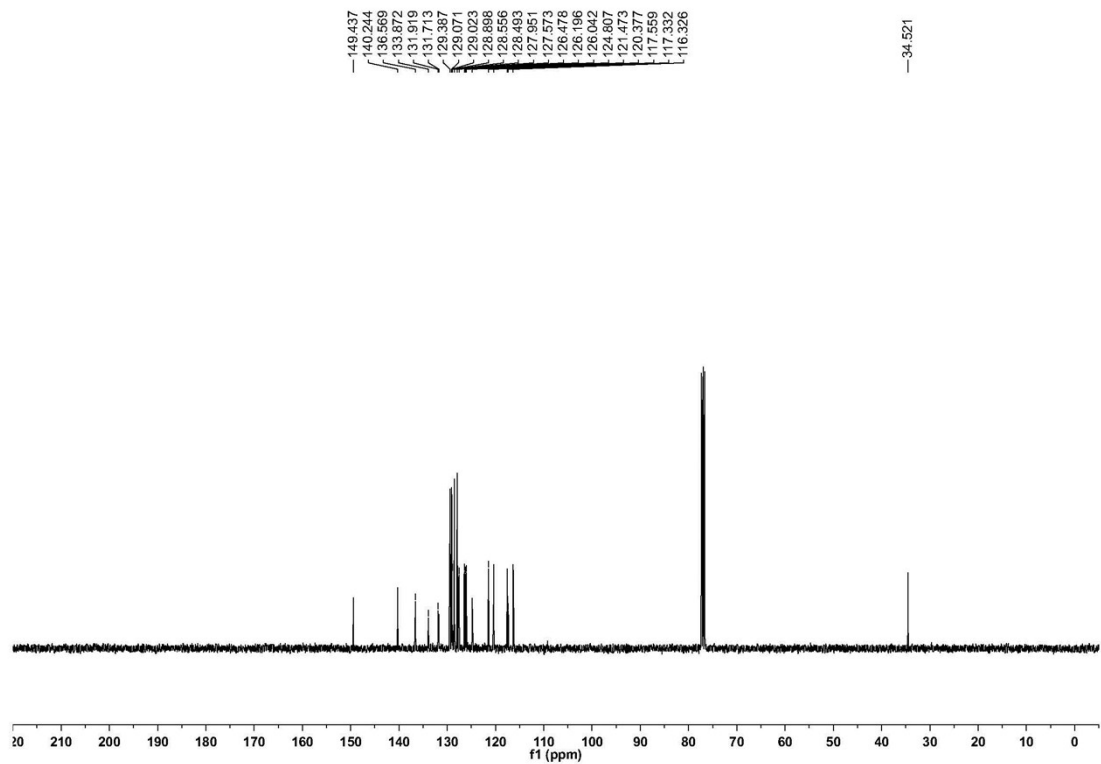

Supplement: c7cc00562h1.pdf [file c7cc00562h1.pdf]
